# Supplementary material for: Transcriptional induction of the heat shock protein B8 mediates the clearance of misfolded proteins responsible for motor neuron diseases
Source: PubMed Central journal article supplement (PMC4785366; doi:10.1038/srep22827), 2016-03-10
Supplement: srep22827-s1.pdf [file srep22827-s1.pdf]

**Transcriptional induction of the heat shock protein B8 mediates the clearance of misfolded proteins responsible for motor neuron diseases.**

Valeria Crippa, Vito G. D'Agostino, Riccardo Cristofani, Paola Rusmini, Maria E. Cicardi, Elio Messi, Rosa Loffredo, Michael Pancher, Margherita Piccolella, Mariarita Galbiati, Marco Meroni, Cristina Cereda, Serena Carra, Alessandro Provenzani, Angelo Poletti

**SUPPLEMENTARY INFORMATIONS**

**Supplementary Table 1. List of primary screening compounds from the highest value of Z score obtained.**

| <b>Z score</b> | <b>Compound</b>              |
|----------------|------------------------------|
| 21,99941565    | DERRUBONE                    |
| 15,20902561    | OXYTETRACYCLINE              |
| 14,84720775    | CYPROTERONE ACETATE          |
| 14,65913419    | MEGESTROL ACETATE            |
| 13,40140129    | CHLOROQUINE DIPHOSPHATE      |
| 12,92332858    | CRESOL                       |
| 12,51162946    | KHAYASIN                     |
| 12,4587408     | ESTRIOL                      |
| 11,65850285    | DOXORUBICIN                  |
| 11,55293956    | AUROTHIOGLUCOSE              |
| 11,33063479    | BUSSEIN                      |
| 9,982033556    | CEDRELONE                    |
| 9,577449431    | COLCHICINE                   |
| 9,533782481    | ESTRADIOL VALERATE           |
| 9,457701464    | FLUMETHAZONE PIVALATE        |
| 9,048836736    | DEXAMETHASONE                |
| 8,984789171    | NITROFURANTOIN               |
| 8,783587187    | SPIRONOLACTONE               |
| 8,60026128     | THIABENDAZOLE                |
| 8,520780029    | PROMETHAZINE HYDROCHLORIDE   |
| 8,363318295    | THIMEROSAL                   |
| 8,305410741    | COLISTIMETHATE SODIUM        |
| 7,917647838    | PRIMAQUINE DIPHOSPHATE       |
| 7,784452876    | ERGONOVINE MALEATE           |
| 7,62457092     | CORTISONE ACETATE            |
| 7,160143379    | MELPHALAN                    |
| 7,0808647      | METRONIDAZOLE                |
| 6,907619389    | CHLORCYCLIZINE HYDROCHLORIDE |
| 6,645654217    | GUAIFENESIN                  |
| 6,613422827    | EQUILIN                      |
| 6,460375731    | ESTRONE                      |
| 6,398278097    | HISTAMINE DIHYDROCHLORIDE    |
| 6,380952751    | NAPHAZOLINE HYDROCHLORIDE    |
| 6,21624689     | PROMAZINE HYDROCHLORIDE      |
| 6,191848845    | DOPAMINE HYDROCHLORIDE       |
| 6,095710019    | NORGESTREL                   |
| 5,959301008    | CYCLOPENTOLATE HYDROCHLORIDE |
| 5,932436211    | METHOCARBAMOL                |
| 5,92852839     | ESTRADIOL                    |
| 5,817663356    | NOVOBIOCIN SODIUM            |
| 5,719952947    | FLURANDRENOLIDE              |
| 5,673409119    | MICONAZOLE NITRATE           |
| 5,552334082    | DYCLONINE HYDROCHLORIDE      |
| 5,528244092    | OLEANDOMYCIN PHOSPHATE       |
| 5,45525056     | MERCAPTOPYRINE               |
| 5,369846248    | TOTALALOLAL                  |
| 5,270962615    | DEACETOXY-7-OXOGEDUNIN       |
| 5,227463713    | HALCINONIDE                  |
| 5,220591674    | NITROFURAZONE                |
| 5,18928383     | CHLOROTHIAZIDE               |

|             |                                          |
|-------------|------------------------------------------|
| 5,089974325 | THEOPHYLLINE                             |
| 5,060561575 | CYCLIZINE                                |
| 4,917026146 | QUINIDINE GLUCONATE                      |
| 4,914285865 | 6-HYDROXYANGOLENSIC ACID METHYL ESTER    |
| 4,837616744 | PRAZOSIN HYDROCHLORIDE                   |
| 4,754426159 | HEPTAMINOL HYDROCHLORIDE                 |
| 4,742038413 | HYDROCORTISONE                           |
| 4,731476501 | METHYLPREDNISOLONE                       |
| 4,678991514 | CYTARABINE                               |
| 4,646633652 | NOREPINEPHRINE                           |
| 4,623513194 | LIPOAMIDE                                |
| 4,615838811 | FLUOCINONIDE                             |
| 4,602055626 | ETHAMBUTOL HYDROCHLORIDE                 |
| 4,548407975 | TRIAMCINOLONE                            |
| 4,524778254 | PHENTOLAMINE HYDROCHLORIDE               |
| 4,51716078  | 1,3-DIDEACETYL-7-DEACETOXY-7-OXOKHIVORIN |
| 4,387834766 | MOXALACTAM DISODIUM                      |
| 4,272578138 | BIOCHANIN A                              |
| 4,213161243 | PACLITAXEL                               |
| 4,177256109 | DESOXYCORTICOSTERONE ACETATE             |
| 4,155330201 | METAPROTERENOL                           |
| 4,130393957 | CLOXYQUIN                                |
| 4,129104007 | CAFESTOL                                 |
| 4,125440515 | MESTRANOL                                |
| 4,042779823 | ETHACRYNIC ACID                          |
| 3,992468555 | ADENOSINE PHOSPHATE                      |
| 3,956954257 | EPIRUBICIN HYDROCHLORIDE                 |
| 3,938537157 | NORETHYNODREL                            |
| 3,930979975 | PROCHLORPERAZINE EDISYLATE               |
| 3,918400805 | BETAMETHASONE VALERATE                   |
| 3,870344581 | 5-FLUOROINDOLE-2-CARBOXYLIC ACID         |
| 3,852622425 | EUGENYL BENZOATE                         |
| 3,851890545 | STREPTOMYCIN SULFATE                     |
| 3,813996618 | DAPSONE                                  |
| 3,807143404 | ORPHENADRINE CITRATE                     |
| 3,792294757 | QUINIC ACID                              |
| 3,714438406 | HYDROQUINIDINE                           |
| 3,713209871 | HYDROCORTISONE HEMISUCCINATE             |
| 3,709652796 | ERGOCALCIFEROL                           |
| 3,617559664 | ADENINE                                  |
| 3,600675526 | LIDOCAINE HYDROCHLORIDE                  |
| 3,5926021   | alpha-DIHYDROGEDUNOL                     |
| 3,542981615 | SOLANESOL                                |
| 3,538792792 | SOLIDAGENONE                             |
| 3,516913525 | PODOTOTARIN                              |
| 3,508416435 | CHLORAMPHENICOL PALMITATE                |
| 3,450898421 | PREDNISOLONE ACETATE                     |
| 3,436374164 | DICYCLOHEXYLUREA                         |
| 3,426925607 | SALICYL ALCOHOL                          |
| 3,416672618 | ETHINYL ESTRADIOL                        |
| 3,395741129 | ANDIROBIN                                |
| 3,382117241 | DACARBAZINE                              |

|             |                                              |
|-------------|----------------------------------------------|
| 3,373444473 | CYCLOPHOSPHAMIDE HYDRATE                     |
| 3,360617687 | N,N-HEXAMETHYLENEAMILORIDE                   |
| 3,357189629 | THIODIGLYCOL                                 |
| 3,318520275 | BUTAMBEN                                     |
| 3,309720013 | CYCLOSERINE                                  |
| 3,279551744 | FENBENDAZOLE                                 |
| 3,272186697 | CEPHAPIRIN SODIUM                            |
| 3,257527326 | MEBENDAZOLE                                  |
| 3,25533315  | VIDARABINE                                   |
| 3,234759559 | EMETINE                                      |
| 3,233369755 | DEMECLOCYCLINE HYDROCHLORIDE                 |
| 3,208484808 | FLUCINOLONE ACETONIDE                        |
| 3,207922299 | TRISODIUM ETHYLENEDIAMINE TETRACETATE        |
| 3,16205863  | SALICYLAMIDE                                 |
| 3,155586309 | PYRANTEL PAMOATE                             |
| 3,144504698 | DEXAMETHASONE ACETATE                        |
| 3,134489425 | MITOXANTHRONE HYDROCHLORIDE                  |
| 3,126921382 | DYPHYLLINE                                   |
| 3,068252029 | CROMOLYN SODIUM                              |
| 3,057242681 | PROPYLTHIOURACIL                             |
| 3,055228284 | EUGENOL                                      |
| 2,971531425 | CEVADINE                                     |
| 2,958947143 | 1,7-DIDEACETOXY-1,7-DIOXO-3-DEACETYLKHIVORIN |
| 2,956547738 | TOMATIDINE HYDROCHLORIDE                     |
| 2,952286971 | ACONITINE                                    |
| 2,948725804 | DEXAMETHASONE SODIUM PHOSPHATE               |
| 2,945503721 | METHOXSALEN                                  |
| 2,931509589 | AZELAIC ACID                                 |
| 2,930756131 | SULFISOXAZOLE                                |
| 2,928825955 | 4-O-METHYLPHLORACETOPHENONE                  |
| 2,918712667 | SODIUM OXYBATE                               |
| 2,91357881  | DEFEROXAMINE MESYLATE                        |
| 2,913074373 | KHAYANTHONE                                  |
| 2,87076817  | ALTHIAZIDE                                   |
| 2,864370274 | alpha-CYANO-4-HYDROXYCINNAMIC ACID           |
| 2,849767868 | DEOXYGEDUNIN                                 |
| 2,799138039 | 3,7-DIMETHOXYFLAVONE                         |
| 2,797389759 | OXYPHENBUTAZONE                              |
| 2,796988759 | PROCAINE HYDROCHLORIDE                       |
| 2,720560304 | NADIDE                                       |
| 2,714381393 | XYLOMETAZOLINE HYDROCHLORIDE                 |
| 2,711526373 | CHLORAMPHENICOL                              |
| 2,688291892 | CAPERATIC ACID                               |
| 2,683949624 | CONIFERYL ALCOHOL                            |
| 2,681959376 | FLUOROURACIL                                 |
| 2,681392813 | DEOXYANDIROBIN LACTONE                       |
| 2,68107157  | METHYL EVERNINATE                            |
| 2,674762284 | IVERMECTIN                                   |
| 2,674611651 | ORSELLINIC ACID                              |
| 2,65567141  | DESIPRAMINE HYDROCHLORIDE                    |
| 2,644186389 | CANRENOIC ACID, POTASSIUM SALT               |
| 2,64276075  | SODIUM SALICYLATE                            |

|             |                                          |
|-------------|------------------------------------------|
| 2,637299255 | 1,2alpha-EPOXYDEACETOXYDIHYDROGEDUNIN    |
| 2,627414361 | METHYLMETHANE SULFONATE                  |
| 2,604466348 | LINDANE                                  |
| 2,597256395 | beta-DIHYDROGEDUNOL                      |
| 2,593881103 | PYRVINIUM PAMOATE                        |
| 2,589595745 | CHLORTETRACYCLINE HYDROCHLORIDE          |
| 2,588708291 | CLINDAMYCIN PALMITATE HYDROCHLORIDE      |
| 2,569361344 | DIFLUBENZURON                            |
| 2,56741524  | HETEROPEUCENIN, METHYL ETHER             |
| 2,558398015 | 3-DEOXO-3beta-ACETOXYDEOXYDIHYDROGEDUNIN |
| 2,545685734 | DISOPYRAMIDE PHOSPHATE                   |
| 2,526298738 | JUAREZIC ACID                            |
| 2,518506461 | INDOLE-2-CARBOXYLIC ACID                 |
| 2,513901691 | SMILAGENIN ACETATE                       |
| 2,507905251 | SPHONDIN                                 |
| 2,507410078 | ESTRADIOL CYPIONATE                      |
| 2,504520645 | BECLOMETHASONE DIPROPIONATE              |
| 2,504247309 | FLUDROCORTISONE ACETATE                  |
| 2,494237016 | MEDRYSONE                                |
| 2,489325852 | APIOLE                                   |
| 2,473089931 | AMINACRINE                               |
| 2,46964381  | GUANETHIDINE SULFATE                     |
| 2,468717851 | SALICYLANILIDE                           |
| 2,457746504 | DANAZOL                                  |
| 2,452924919 | SULFADIAZINE                             |
| 2,44985331  | HYDROCORTISONE PHOSPHATE TRIETHYLAMINE   |
| 2,449565281 | HYDRALAZINE HYDROCHLORIDE                |
| 2,434713933 | HYDROXYZINE PAMOATE                      |
| 2,428700194 | SULFACETAMIDE                            |
| 2,420324069 | FLURBIPROFEN                             |
| 2,416116463 | METHYLTHIOURACIL                         |
| 2,412816672 | STREPTOZOSIN                             |
| 2,407317009 | HEXYLRESORCINOL                          |
| 2,398880917 | THEAFLAVIN MONOGALLATES                  |
| 2,393904177 | MAFENIDE HYDROCHLORIDE                   |
| 2,37897749  | DIPHENYLPYRALINE HYDROCHLORIDE           |
| 2,369623875 | NITROMIDE                                |
| 2,365499349 | SISOMICIN SULFATE                        |
| 2,356864663 | TRIFLUMURON                              |
| 2,338413268 | METHIMAZOLE                              |
| 2,325994266 | TRYPTAMINE                               |
| 2,322457031 | CAPTOPRIL                                |
| 2,321604851 | TETRACAINE HYDROCHLORIDE                 |
| 2,320517858 | ETHIONAMIDE                              |
| 2,313487375 | SENNOSIDE B                              |
| 2,298394236 | TROPINE                                  |
| 2,285477439 | RIFAMPIN                                 |
| 2,284348237 | DEXTROMETHORPHAN HYDROBROMIDE            |
| 2,271358405 | DIBUTYL PHTHALATE                        |
| 2,265359798 | FLUNISOLIDE                              |
| 2,26109939  | ISONIAZID                                |
| 2,259806708 | CHLORAMBUCIL                             |

|             |                                               |
|-------------|-----------------------------------------------|
| 2,25515977  | DEOXSAPPANONE B 7,4'-DIMETHYL ETHER           |
| 2,254016105 | DEOXYKHIVORIN                                 |
| 2,251711305 | HYDROCHLOROTHIAZIDE                           |
| 2,241520556 | FUROSEMIDE                                    |
| 2,237150472 | DISULFIRAM                                    |
| 2,229434985 | ZOXAZOLAMINE                                  |
| 2,201076871 | ETHIONINE                                     |
| 2,19708117  | SULFAPYRIDINE                                 |
| 2,191572687 | GENISTEIN                                     |
| 2,181238786 | alpha-HYDROXYDEOXYCHOLIC ACID                 |
| 2,167598502 | INDOLE-3-CARBINOL                             |
| 2,165311525 | ETHACRIDINE LACTATE                           |
| 2,150875721 | THIOPENTAL SODIUM                             |
| 2,149631556 | ISOPROTERENOL HYDROCHLORIDE                   |
| 2,14584355  | METHOTREXATE(+/-)                             |
| 2,140287474 | SULFAMETHAZINE                                |
| 2,135895021 | SPECTINOMYCIN HYDROCHLORIDE                   |
| 2,131214619 | RESVERATROL 4'-METHYL ETHER                   |
| 2,1257765   | ERYTHROMYCIN ETHYLSUCCINATE                   |
| 2,11995368  | ETHOPROPAZINE HYDROCHLORIDE                   |
| 2,118184234 | DIALLYL SULFIDE                               |
| 2,10910262  | DIOSMETIN                                     |
| 2,107926186 | METHYL DEOXYCHOLATE                           |
| 2,104911051 | CHLORPHENIRAMINE (S) MALEATE                  |
| 2,101947859 | ALBENDAZOLE                                   |
| 2,094655897 | ERYTHROMYCIN                                  |
| 2,086626054 | ISOFLUPREDNONE ACETATE                        |
| 2,078448047 | PREDNISOLONE                                  |
| 2,078448047 | PROGESTERONE                                  |
| 2,078448047 | PRYIMETHAMINE                                 |
| 2,07532281  | DIPHENHYDRAMINE HYDROCHLORIDE                 |
| 2,075100431 | SULINDAC                                      |
| 2,069250367 | PROTOPORPHYRIN IX                             |
| 2,067200264 | RUTOSIDE (rutin)                              |
| 2,06338364  | DEHYDROVARIABILIN                             |
| 2,061711501 | BOLDINE                                       |
| 2,057528558 | QUINACRINE HYDROCHLORIDE                      |
| 2,044779159 | HYDROXYUREA                                   |
| 2,035040942 | 2,4-DICHLOROPHENOXYACETIC ACID, ISOCTYL ESTER |
| 2,015128284 | KINETIN                                       |
| 2,004770644 | AMINOPYRINE                                   |
| 2,001180239 | TESTOSTERONE PROPIONATE                       |
| 2,00110743  | HALOPERIDOL                                   |
| 1,996194122 | 2-HYDROXY-5 (6)EPOXY-TETRAHYDROCARYOPHYLLENE  |
| 1,99052752  | PUTRESCINE DIHYDROCHLORIDE                    |
| 1,983769744 | COENZYME B12                                  |
| 1,979663792 | RETUSIN 7-METHYL ETHER                        |
| 1,975745203 | RESORCINOL                                    |
| 1,974880117 | CURCUMIN                                      |
| 1,972314109 | RHODINYL ACETATE                              |
| 1,972095109 | beta-AMYRIN ACETATE                           |
| 1,958576555 | SULFAMETHIZOLE                                |

|             |                                             |
|-------------|---------------------------------------------|
| 1,958455129 | MITOTANE                                    |
| 1,944207407 | 3-PINANONE OXIME                            |
| 1,939880069 | BENSERAZIDE HYDROCHLORIDE                   |
| 1,924679636 | DEOXYGEDUNOL ACETATE                        |
| 1,917487625 | BETAMETHASONE                               |
| 1,894935802 | ROSOLIC ACID                                |
| 1,894057777 | CHLOROXYLENOL                               |
| 1,889710163 | NIMESULIDE                                  |
| 1,882484804 | HELENINE                                    |
| 1,877499249 | DANTHRON                                    |
| 1,873400637 | ASPIRIN                                     |
| 1,867403454 | ALDRIN                                      |
| 1,864041871 | 4'-METHOXYFLAVONE                           |
| 1,861075508 | KUHLMANNIN                                  |
| 1,857605358 | XYLOCARPUS A                                |
| 1,855673968 | HETACILLIN POTASSIUM                        |
| 1,848142521 | 8beta-HYDROXYCARAPIN, 3,8-HEMIACETAL        |
| 1,848004075 | METAXALONE                                  |
| 1,846821627 | RACEPHEDRINE HYDROCHLORIDE                  |
| 1,844981235 | MEPARTRICIN                                 |
| 1,843252895 | PYRITHIONE ZINC                             |
| 1,836913198 | 3,16-DIDEOXYMEXICANOLIDE-3beta-DIOL         |
| 1,834505141 | 3-AMINO-1,2,4-TRIAZOLE                      |
| 1,823225307 | TOLAZOLINE HYDROCHLORIDE                    |
| 1,804289728 | METHYL ORSELLINATE                          |
| 1,798041558 | MUCIC ACID                                  |
| 1,796681279 | NORHARMAN                                   |
| 1,787598251 | CORALYNE CHLORIDE                           |
| 1,773645668 | CARMOFUR                                    |
| 1,763726734 | OXOTREMORINE SESQUIFUMARATE                 |
| 1,763395798 | HOMATROPINE METHYLBROMIDE                   |
| 1,754009656 | 2-METHOXYRESORCINOL                         |
| 1,754003845 | MELIBIOSE                                   |
| 1,750908426 | EVERNINIC ACID                              |
| 1,74752469  | ESTRAGOLE                                   |
| 1,73698137  | HYDROCORTISONE ACETATE                      |
| 1,724182299 | HEXACHLOROPHENE                             |
| 1,716261999 | CLOBETASOL PROPIONATE                       |
| 1,705504946 | 8-HYDROXYCARAPINIC ACID                     |
| 1,704130632 | 3,4-DIHYDROXYCARANE                         |
| 1,698418517 | PROCYCLIDINE HYDROCHLORIDE                  |
| 1,693115934 | TOTAROL ACETATE                             |
| 1,681346033 | GUANABENZ ACETATE                           |
| 1,679679561 | SUXIBUZONE                                  |
| 1,679676368 | ALIZARIN                                    |
| 1,676720977 | TERBUTALINE HEMISULFATE                     |
| 1,668100527 | UTILIN                                      |
| 1,65657366  | 7-NITROINDAZOLE                             |
| 1,650170998 | DEOXSAPPANONE B 7,3'-DIMETHYL ETHER ACETATE |
| 1,648183776 | KHIVORIN                                    |
| 1,646041563 | BENTAZON                                    |
| 1,643594193 | NIFENAZONE                                  |

|             |                                                |
|-------------|------------------------------------------------|
| 1,635011103 | PROBUCOL                                       |
| 1,629936267 | DICLOFENAC SODIUM                              |
| 1,628679613 | ACETAMINOPHEN                                  |
| 1,623779292 | NICLOSAMIDE                                    |
| 1,613504227 | AURAPTENE                                      |
| 1,597050982 | VALPROATE SODIUM                               |
| 1,596578727 | CHRYSIN DIMETHYL ETHER                         |
| 1,596071214 | 1,4,5,8-TETRAHYDROXY-2,6-DIMETHYLANTHROQUINONE |
| 1,591611509 | CIANIDANOL                                     |
| 1,590116475 | HESPERETIN                                     |
| 1,590063904 | TAMOXIFEN CITRATE                              |
| 1,582106584 | 7-DESACETOXY-6,7-DEHYDROGEDUNIN                |
| 1,578357323 | HYGROMYCIN B                                   |
| 1,571054449 | DIFFRACTAIC ACID                               |
| 1,570884614 | d,l-threo-3-HYDROXYASPARTIC ACID               |
| 1,567057282 | PSEUDO-ANISATIN                                |
| 1,566159136 | DOXEPIN HYDROCHLORIDE                          |
| 1,564021756 | ACETAZOLAMIDE                                  |
| 1,560856175 | KETOTIFEN FUMARATE                             |
| 1,557726557 | DESOXYMETASONE                                 |
| 1,553564477 | GRAMICIDIN                                     |
| 1,552996105 | EPICATECHIN                                    |
| 1,552582378 | beta-AMYRIN                                    |
| 1,53828471  | 3-DESHYDROXSAPPANOL TRIMETHYL ETHER            |
| 1,52412461  | PICROTIN                                       |
| 1,518202248 | CEPHARANTHINE                                  |
| 1,515739837 | LITHOCHOLIC ACID                               |
| 1,51163494  | SULFAMETHOXAZOLE                               |
| 1,505629949 | hederacoside C                                 |
| 1,502645913 | LATHOSTEROL                                    |
| 1,494370165 | EPOXY (4,5alpha)-4,5-DIHYDROSANTONIN           |
| 1,49422758  | RAMIFENAZONE                                   |
| 1,492989341 | SINOMENINE                                     |
| 1,491111816 | URSODIOL                                       |
| 1,48994271  | CHOLIC ACID, METHYL ESTER                      |
| 1,485611447 | DIURON                                         |
| 1,48364971  | 3beta-HYDROXYISOALLOSPIROST-9(11)-ENE          |
| 1,483284075 | 3-NOR-3-OXOPANASINSAN-6-OL                     |
| 1,482256159 | METHSCOPOLAMINE BROMIDE                        |
| 1,481276866 | CHOLESTEROL                                    |
| 1,476698178 | HYDROFLUMETHIAZIDE                             |
| 1,475284253 | SCOPOLAMINE HYDROBROMIDE                       |
| 1,473433392 | 3-HYDROXYFLAVONE                               |
| 1,471502265 | PHENAZOPYRIDINE HYDROCHLORIDE                  |
| 1,467445266 | AMCINONIDE                                     |
| 1,464367813 | HAEMATOPORPHYRIN                               |
| 1,454316048 | CARBIMAZOLE                                    |
| 1,453132239 | CARAPIN-8(9)-ENE                               |
| 1,448429237 | TANGERITIN                                     |
| 1,447502122 | BETULINIC ACID                                 |
| 1,443013713 | FARNESOL                                       |
| 1,433152811 | DIHYDRODEOXYGEDUNIN                            |



|             |                                                   |
|-------------|---------------------------------------------------|
| 1,43210957  | LEVONORDEFIN                                      |
| 1,424891538 | SWIETENOLIDE DIACETATE                            |
| 1,417801391 | ACADESINE                                         |
| 1,409767012 | MECLOFENOXATE HYDROCHLORIDE                       |
| 1,408320676 | ENOXOLONE                                         |
| 1,405010004 | DOXYLAMINE SUCCINATE                              |
| 1,397860302 | MEXICANOLIDE                                      |
| 1,39689943  | BENZO[a]PYRENE                                    |
| 1,383251112 | BICUCULLINE (+)                                   |
| 1,382693792 | 3-DEOXO-3beta-HYDROXYMEXICANOLIDE 16-ENOL ETHER   |
| 1,382611724 | HECOGENIN ACETATE                                 |
| 1,378995715 | GALLAMINE TRIETHIODIDE                            |
| 1,37211732  | BENZTROPINE                                       |
| 1,370552722 | 2,4-DICHLOROPHENOXYACETIC ACID, METHYL ESTER      |
| 1,364724279 | MANNITOL                                          |
| 1,361441906 | NORTRIPTYLINE                                     |
| 1,357631598 | ETHYL PARABEN                                     |
| 1,354496986 | NEOMYCIN SULFATE                                  |
| 1,354076182 | IPRATROPIUM BROMIDE                               |
| 1,352267083 | CEFADROXIL                                        |
| 1,351349975 | BACLOFEN                                          |
| 1,342707561 | BISACODYL                                         |
| 1,341695647 | FUSIDIC ACID                                      |
| 1,340546801 | PYRITHYLDIONE                                     |
| 1,339456647 | FORMONONETIN                                      |
| 1,33707305  | 3,4-DIMETHOXYDALBERGIONE                          |
| 1,333976757 | DESONIDE                                          |
| 1,329529275 | TODRALAZINE HYDROCHLORIDE                         |
| 1,325314357 | 2,5-DIHYDROXY-3,4-DIMETHOXY-4'-ETHOXYBENZOPHENONE |
| 1,32481936  | BENZOCAINE                                        |
| 1,322083285 | ATOMOXETINE HYDROCHLORIDE                         |
| 1,317457774 | DOCOSANOL                                         |
| 1,313957514 | AVOCADYNE ACETATE                                 |
| 1,309780604 | LAPACHOL                                          |
| 1,30811264  | PROMETON                                          |
| 1,300858413 | HALAZONE                                          |
| 1,300690279 | QUININE SULFATE                                   |
| 1,298535436 | PRAZIQUANTEL                                      |
| 1,298213987 | PICROTOXININ                                      |
| 1,296561534 | LUPANINE PERCHLORATE                              |
| 1,295997739 | alpha-MANGOSTIN                                   |
| 1,295020049 | DILTIAZEM HYDROCHLORIDE                           |
| 1,285883852 | CULMORIN                                          |
| 1,285608738 | QUININE ETHYL CARBONATE                           |
| 1,278730524 | DEXPROPRANOLOL HYDROCHLORIDE                      |
| 1,278055519 | PURPUROGALLIN                                     |
| 1,276749234 | TRIMEDLURE                                        |
| 1,269959584 | DERRUSTONE                                        |
| 1,259803594 | TRAMADOL HYDROCHLORIDE                            |
| 1,255128749 | BETAMETHAZONE SODIUM PHOSPHATE                    |
| 1,255062907 | HOMATROPINE BROMIDE                               |
| 1,253729756 | GLUTAMINE (L)                                     |

|             |                                                    |
|-------------|----------------------------------------------------|
| 1,253419952 | LUFENURON                                          |
| 1,252635756 | CHLOROPHYLL                                        |
| 1,251687956 | SULFABENZAMIDE                                     |
| 1,250080181 | THEANINE                                           |
| 1,249465357 | TYRAMINE                                           |
| 1,247068828 | RHIZOCARPIC ACID                                   |
| 1,242745216 | PROCAINAMIDE HYDROCHLORIDE                         |
| 1,237836694 | ADENOSINE                                          |
| 1,237293038 | DIMETHOATE                                         |
| 1,230466728 | 4-NAPHTHALIMIDOBUTYRIC ACID                        |
| 1,227545988 | ANTHRAQUINONE                                      |
| 1,2262099   | AMINOSALICYLATE SODIUM                             |
| 1,221275354 | CONVALLATOXIN                                      |
| 1,218952905 | VINBLASTINE SULFATE                                |
| 1,218932715 | GLYCYRRHIZIC ACID, AMMONIUM SALT                   |
| 1,215313487 | 1R,9S-HYDRASTINE                                   |
| 1,212822831 | 3-METHOXYCATECHOL                                  |
| 1,208754803 | THIRAM                                             |
| 1,208220072 | PROMETRYN                                          |
| 1,207266811 | FURAZOLIDONE                                       |
| 1,20474908  | PYRROMYCIN                                         |
| 1,202245765 | HYDRASTINE (1R, 9S)                                |
| 1,199322064 | BUDESONIDE                                         |
| 1,19860674  | PYRILAMINE MALEATE                                 |
| 1,197964402 | CATECHIN TETRAMETHYLETHER                          |
| 1,196956046 | VALERYL SALICYLATE                                 |
| 1,196320424 | 4-AMINOETHYLBENZENESULFONYL FLUORIDE HYDROCHLORIDE |
| 1,193059128 | HYDROCORTISONE VALERATE                            |
| 1,193057317 | CHAULMOGRIC ACID                                   |
| 1,192962776 | OCTODRINE                                          |
| 1,191155886 | PRIMIDONE                                          |
| 1,190624131 | 8-HYDROXY-15,16-BISNOR-11-LABDEN-13-ONE            |
| 1,188573413 | PHENETHICILLIN POTASSIUM                           |
| 1,184860208 | IMIPRAMINE HYDROCHLORIDE                           |
| 1,184404422 | DULOXETINE HYDROCHLORIDE                           |
| 1,182839694 | MEDROXYPROGESTERONE ACETATE                        |
| 1,18191069  | AZATHIOPRINE                                       |
| 1,180680097 | EPICHOLESTANOL                                     |
| 1,18061382  | AMINOETHOXYDIPHENYLBORANE                          |
| 1,177290014 | 1,4-NAPHTHOQUINONE                                 |
| 1,177110464 | METHIONYL-LEUCYLPHENYLALANINE ACETATE              |
| 1,171482859 | TRIAMCINOLONE ACETONIDE                            |
| 1,171379505 | TEMEFOS                                            |
| 1,170459557 | 7-DEACETYLKHIVORIN                                 |
| 1,169918687 | PURPUROGALLIN-4-CARBOXYLIC ACID                    |
| 1,167552091 | CHLORPROPHAM                                       |
| 1,166405735 | ERYTHROSINE SODIUM                                 |
| 1,165653709 | CHRYSANTHEMIC ACID, ETHYL ESTER                    |
| 1,164971805 | 3-HYDROXY-3',4'-DIMETHOXYFLAVONE                   |
| 1,163144654 | MUUROLLADIE-3-ONE                                  |
| 1,159457492 | CAPSANTHIN                                         |
| 1,157627732 | DICHLORODIPHENYLDICHLOROETHYLENE                   |

|             |                                     |
|-------------|-------------------------------------|
| 1,155761724 | AMPICILLIN SODIUM                   |
| 1,152812448 | PALMATINE CHLORIDE                  |
| 1,152077664 | BUFEXAMAC                           |
| 1,150938988 | DIHYDROFISSINOLIDE                  |
| 1,15088308  | EPOXYGEDUNIN                        |
| 1,148611491 | TETRACHLOROISOPHTHALONITRILE        |
| 1,146463468 | ACRISORCIN                          |
| 1,144965755 | KHELLIN                             |
| 1,140103821 | MOLSIDOMINE                         |
| 1,138676209 | ROXARSONE                           |
| 1,13855537  | AMPROLIUM                           |
| 1,138405063 | alpha-TOCHOPHEROL                   |
| 1,137373014 | CEPHALORIDINE                       |
| 1,135454856 | BENZTHIAZIDE                        |
| 1,131978511 | ANTAZOLINE PHOSPHATE                |
| 1,130847128 | CHLOROGENIC ACID                    |
| 1,128315116 | IDEBENONE                           |
| 1,124208318 | DJENKOLIC ACID                      |
| 1,124139784 | COLFORSIN                           |
| 1,123763695 | TETRAHYDROZOLINE HYDROCHLORIDE      |
| 1,123186764 | AZACITIDINE                         |
| 1,122071955 | GUANIDINE CARBONATE                 |
| 1,121598292 | SODIUM NITROPRUSSIDE                |
| 1,1207604   | BROMOPRIDE                          |
| 1,119592439 | AZTREONAM                           |
| 1,118807013 | MADECASSIC ACID                     |
| 1,118750383 | ROSUVASTATIN CALCIUM                |
| 1,11712832  | 3,3'-DIINDOLYLMETHANE               |
| 1,113539928 | IRIGINOL HEXAACEATATE               |
| 1,112289609 | DEOXSAPPANONE B 7,3'-DIMETHYL ETHER |
| 1,108412798 | TOLTERODINE TARTRATE                |
| 1,106668647 | ACETYLCYSTEINE                      |
| 1,105271867 | PRENYLETIN                          |
| 1,101596638 | KINETIN RIBOSIDE                    |
| 1,096704612 | QUINAMIDE ISOPROPYLIDENE            |
| 1,095108562 | DIOSGENIN                           |
| 1,091056306 | AMOXICILLIN                         |
| 1,091035408 | COUMARIN                            |
| 1,090433776 | MENTHYL BENZOATE                    |
| 1,089316788 | 3beta-ACETOXYDEOXODIHYDROGEDUNIN    |
| 1,087685036 | SALSALATE                           |
| 1,080521697 | SANGUINARINE SULFATE                |
| 1,078676062 | DIPYRONE                            |
| 1,074249839 | AMITRIPTYLINE HYDROCHLORIDE         |
| 1,073830473 | OXYBUTYNIN CHLORIDE                 |
| 1,072173176 | PENTYLENETETRAZOL                   |
| 1,07089445  | PODOPHYLLOTOXIN ACETATE             |
| 1,07027796  | ASARININ (-)                        |
| 1,06628107  | ICARIIN                             |
| 1,065900181 | TRIMEBUTINE MALEATE                 |
| 1,062802818 | CINCHONIDINE                        |
| 1,060517469 | SPARTEINE SULFATE                   |

|             |                                                   |
|-------------|---------------------------------------------------|
| 1,057941685 | HYDROCORTISONE BUTYRATE                           |
| 1,057077592 | 2,4-DINITROPHENOL                                 |
| 1,055285135 | TESTOSTERONE                                      |
| 1,052005753 | PROPAFENONE HYDROCHLORIDE                         |
| 1,051759356 | BETHANECHOL CHLORIDE                              |
| 1,051658635 | IDOQUINOL                                         |
| 1,047357732 | PROPANTHELINE BROMIDE                             |
| 1,044072511 | MERBROMIN                                         |
| 1,042211382 | PHENACYLAMINE HYDROCHLORIDE                       |
| 1,039959288 | ADONITOL                                          |
| 1,037944085 | 5-HYDROXY-2',4',7,8-TETRAMETHOXYFLAVONE           |
| 1,037240664 | ALLOPREGNANOLONE                                  |
| 1,036403763 | 3-HYDROXY-4-(SUCCIN-2-YL)-CARYOLANE delta-LACTONE |
| 1,035513434 | PROTOVERATRINE A                                  |
| 1,035429126 | GRISEOFULVIN                                      |
| 1,035345678 | LORGLUMIDE SODIUM                                 |
| 1,029239019 | SUCRALFATE SODIUM (10% w/v in DMSO)               |
| 1,026385406 | CLOVANEDIOL DIACETATE                             |
| 1,025503122 | alpha-METHYL-L-TYROSINE                           |
| 1,025343866 | AMINOHYDROXYBUTYRIC ACID                          |
| 1,024359312 | GARLICIN                                          |
| 1,022953284 | RETINYL ACETATE                                   |
| 1,020827925 | 2-THIOURACIL                                      |
| 1,02063869  | PHENYLBUTAZONE                                    |
| 1,019226943 | ACEBUTOLOL HYDROCHLORIDE                          |
| 1,017790132 | MAPROTILINE HYDROCHLORIDE                         |
| 1,017542793 | N-METHYL-D-ASPARTIC ACID (NMDA)                   |
| 1,012570151 | TOLNAFTATE                                        |
| 1,012303252 | ENDRIN                                            |
| 1,011779389 | ANTHOTHECOL                                       |
| 1,010866956 | GEDUNIN                                           |
| 1,009358636 | TRIPLENNAMINE CITRATE                             |
| 1,007242809 | ETANIDAZOLE                                       |
| 1,004487621 | HERNIARIN                                         |
| 1,001322713 | 3,7-EPOXYCARYOPHYLLAN-6-OL                        |
| 1,000503763 | L-BUTHIONINE SULFOXIMINE                          |
| 0,996143386 | CAFFEIC ACID                                      |
| 0,993629616 | LANSOPRAZOLE                                      |
| 0,992101518 | beta-CAROTENE                                     |
| 0,991951725 | PLUMBAGIN                                         |
| 0,99155973  | BERBAMINE HYDROCHLORIDE                           |
| 0,987199195 | NALIDIXIC ACID                                    |
| 0,986153415 | FLUTAMIDE                                         |
| 0,982747485 | ACETOHYDROXAMIC ACID                              |
| 0,978569881 | METOPROLOL TARTRATE                               |
| 0,977744758 | BERGENIN                                          |
| 0,966890609 | 3,7-DIHYDROXYFLAVONE                              |
| 0,964740223 | INDOMETHACIN                                      |
| 0,962027371 | KETOPROFEN                                        |
| 0,959977891 | PATULIN                                           |
| 0,95776102  | VISNAGIN                                          |
| 0,955496099 | FERULIC ACID                                      |

|             |                                                   |
|-------------|---------------------------------------------------|
| 0,951909195 | ANISINDIONE                                       |
| 0,951097055 | 3-DEOXY-3beta-HYDROXYANGOLENSIC ACID METHYL ESTER |
| 0,948087009 | 2-MERCAPTOBENZOTHIAZOLE                           |
| 0,946868082 | HYDRINDANTIN HYDRATE                              |
| 0,940622974 | ESTRONE BENZOATE                                  |
| 0,938608712 | CEDROL                                            |
| 0,935986917 | SULFAMERAZINE                                     |
| 0,935487643 | DAUNORUBICIN                                      |
| 0,935254097 | 2,3-DICHLORO-5,8-DIHYDROXYNAPHTHOQUINONE          |
| 0,935196354 | ACONITIC ACID                                     |
| 0,930992592 | OLEANOIC ACID                                     |
| 0,930299793 | DIHYDROMUNDULETONE                                |
| 0,924489674 | METHYLERGONOVINE MALEATE                          |
| 0,92338921  | LEVOTHYROXINE                                     |
| 0,923170269 | NALBUPHINE HYDROCHLORIDE                          |
| 0,919418938 | MIMOSINE                                          |
| 0,91818711  | BIXIN                                             |
| 0,917868578 | CLOPAMIDE                                         |
| 0,91371874  | BENAZEPRIL HYDROCHLORIDE                          |
| 0,912298641 | CYSTEAMINE HYDROCHLORIDE                          |
| 0,910340244 | 7-DEACETOXY-7-OXOKHIVORIN                         |
| 0,90859633  | CLOFIBRATE                                        |
| 0,907842218 | USNIC ACID                                        |
| 0,906765652 | GEMFIBROZIL                                       |
| 0,905295904 | BISSALICYL FUMARATE                               |
| 0,901743963 | AMODIAQUINE DIHYDROCHLORIDE                       |
| 0,898979887 | PREDNISOLONE HEMISUCCINATE                        |
| 0,897109014 | DEGUELIN(-)                                       |
| 0,894979448 | CARBETAPENTANE CITRATE                            |
| 0,894909832 | PERILLYL ALCOHOL                                  |
| 0,889716384 | RITANSERIN                                        |
| 0,889156857 | REBAMIPIDE                                        |
| 0,885068202 | HYDRASTININE HYDROCHLORIDE                        |
| 0,884437294 | HYOSCYAMINE                                       |
| 0,883258855 | HYDROLYSIS PRODUCT OF BUSSEIN                     |
| 0,882934254 | AMPHOTERICIN B                                    |
| 0,88195869  | CLOMIPHENE CITRATE                                |
| 0,879490492 | MINOCYCLINE HYDROCHLORIDE                         |
| 0,878923682 | APOTOXICAROL                                      |
| 0,878747207 | METHOMYL                                          |
| 0,876470938 | PIPEMIDIC ACID                                    |
| 0,874364961 | PIPENZOLATE BROMIDE                               |
| 0,873771721 | FENBUFEN                                          |
| 0,872997651 | KHAYASIN C                                        |
| 0,869192008 | LUPININE                                          |
| 0,863818439 | NYSTATIN                                          |
| 0,863754835 | GUAIOL(-)                                         |
| 0,855499917 | MELENGESTROL ACETATE                              |
| 0,8544885   | ANTHRALIN                                         |
| 0,852839878 | GENTAMICIN SULFATE                                |
| 0,852809908 | KAINIC ACID                                       |
| 0,852057463 | ARABITOL(D)                                       |

|             |                                      |
|-------------|--------------------------------------|
| 0,849620104 | CINEOLE                              |
| 0,847523087 | CITRULLINE                           |
| 0,845791319 | TRIMETHADIONE                        |
| 0,843420932 | RHOIFOLIN                            |
| 0,842473207 | HARMALOL HYDROCHLORIDE               |
| 0,833303098 | ESCULIN MONOHYDRATE                  |
| 0,832947669 | ALVERINE CITRATE                     |
| 0,830255086 | CITRININ                             |
| 0,828936405 | GLUTAMINE (D)                        |
| 0,828607633 | ACETANILIDE                          |
| 0,825991393 | HARMINE                              |
| 0,82427338  | DIPYRIDAMOLE                         |
| 0,822485542 | DIHYDROGEDUNIN                       |
| 0,821319224 | LUNARINE                             |
| 0,817450155 | PSEUDOEPHEDRINE HYDROCHLORIDE        |
| 0,815576018 | CEDRYL ACETATE                       |
| 0,815388578 | SELEGILINE HYDROCHLORIDE             |
| 0,814891707 | ISOXSUPRINE HYDROCHLORIDE            |
| 0,812188762 | MANGIFERIN                           |
| 0,810475632 | ISOKOBUSONE                          |
| 0,810248151 | 6-AMINONICOTINAMIDE                  |
| 0,807431882 | SYRINGIC ACID                        |
| 0,804217614 | CARYOPHYLLENE [t(-)]                 |
| 0,804078255 | NORETHINDRONE ACETATE                |
| 0,802424199 | 15-NORCARYOPHYLLEN-3-ONE             |
| 0,800444158 | SORBITOL                             |
| 0,799536944 | SULFAQUINOXALINE SODIUM              |
| 0,796693018 | GENETICIN                            |
| 0,791035429 | TRETINON                             |
| 0,784743929 | HAEMATOXYLIN PENTAACETATE            |
| 0,780775584 | ERGOTAMINE TARTRATE                  |
| 0,779946811 | BETAMETHASONE ACETATE                |
| 0,777585062 | ZOMEPIRAC SODIUM                     |
| 0,776242654 | NABUMETONE                           |
| 0,775027923 | ATRANORIN                            |
| 0,77493091  | ESTRADIOL PROPIONATE                 |
| 0,771200334 | IMIDAZOL-4-YLACETIC ACID SODIUM SALT |
| 0,771004331 | 4-HYDROXY-6-METHYLPYRAN-2-ONE        |
| 0,767167162 | TELENZEPINE HYDROCHLORIDE            |
| 0,764719976 | ALLOPURINOL                          |
| 0,764410684 | OCTISALATE                           |
| 0,762959238 | DIBENZOYLMETHANE                     |
| 0,762512518 | MYCOPHENOLIC ACID                    |
| 0,762105615 | TRIADIMEFON                          |
| 0,758777577 | DECAMETHONIUM BROMIDE                |
| 0,758666366 | APOMORPHINE HYDROCHLORIDE            |
| 0,757813144 | L-PHENYLALANINOL                     |
| 0,757684997 | PELLETIERINE HYDROCHLORIDE           |
| 0,755897291 | XANTHONE                             |
| 0,755718132 | FRIEDELIN                            |
| 0,755163421 | PRIDINOL METHANESULFONATE            |
| 0,755106308 | STRYCHNINE                           |

|             |                                               |
|-------------|-----------------------------------------------|
| 0,754331154 | BACAMPICILLIN HYDROCHLORIDE                   |
| 0,753681981 | CEPHALOTAXINE                                 |
| 0,752313631 | PHENYLPROPANOLAMINE HYDROCHLORIDE             |
| 0,751880829 | PURPURIN                                      |
| 0,750802641 | 1,7-DIDEACETOXY-1,7-DIOXOKHIVORIN             |
| 0,749581939 | ANISOMYCIN                                    |
| 0,745860466 | 3,7-EPOXYCARYOPHYLLAN-6-ONE                   |
| 0,744480122 | AMBROXOL HYDROCHLORIDE                        |
| 0,742135753 | 2,3-DIHYDROXY-4-METHOXY-4'-ETHOXYBENZOPHENONE |
| 0,742068834 | PHYSOSTIGMINE SALICYLATE                      |
| 0,741662646 | CHLORANIL                                     |
| 0,741527996 | NICARDIPINE HYDROCHLORIDE                     |
| 0,74123478  | METHYLDOPA                                    |
| 0,740900623 | DIBUCAINE HYDROCHLORIDE                       |
| 0,740655488 | DEBRISOQUIN SULFATE                           |
| 0,739587249 | GOSSYPETIN                                    |
| 0,738131772 | 4'-METHOXYCHALCONE                            |
| 0,737038875 | URSOCHOLANIC ACID                             |
| 0,736048856 | CARNOSINE                                     |
| 0,735159205 | TRAZODONE HYDROCHLORIDE                       |
| 0,731577117 | AMILORIDE HYDROCHLORIDE                       |
| 0,726036929 | YOHIMBINE HYDROCHLORIDE                       |
| 0,726020718 | CARMUSTINE                                    |
| 0,725835736 | URSOLIC ACID                                  |
| 0,72272443  | ENTANDROPHRAGMIN                              |
| 0,72111209  | TRIOXSALEN                                    |
| 0,720815451 | APIGENIN                                      |
| 0,717846787 | SULFINPYRAZONE                                |
| 0,716970226 | PRONETALOL HYDROCHLORIDE                      |
| 0,716258701 | 1R,2S-PHENYLPROPYLAMINE                       |
| 0,714442691 | L(+/-)-ALLIIN                                 |
| 0,714071814 | BETAMETHASONE 17,21-DIPROPIONATE              |
| 0,713372564 | AZINPHOS METHYL                               |
| 0,712786753 | 2',4-DIHYDROXY-3,4',6'-TRIMETHOXYCHALCONE     |
| 0,710938385 | CARBENOXOLONE SODIUM                          |
| 0,7079269   | LUPANYL ACID HYDROCHLORIDE                    |
| 0,707519896 | TRIPTOPHENOLIDE                               |
| 0,70655795  | TYLOSIN TARTRATE                              |
| 0,706386209 | CICLOPIROX OLAMINE                            |
| 0,705430835 | AMINOETHYLISOTHIUREA DIHYDROBROMIDE           |
| 0,70253257  | DIFLUNISAL                                    |
| 0,702097801 | GOSSYPOL                                      |
| 0,70152095  | LISINOPRIL                                    |
| 0,700964246 | GITOXIGENIN DIACETATE                         |
| 0,699869032 | FUCOSTANOL                                    |
| 0,69574374  | FENOTEROL HYDROBROMIDE                        |
| 0,693610579 | AMIKACIN SULFATE                              |
| 0,691249668 | HYDROXYPROGESTERONE CAPROATE                  |
| 0,690571649 | CLOTRIMAZOLE                                  |
| 0,686756523 | TETRACYCLINE HYDROCHLORIDE                    |
| 0,677351054 | PIPERINE                                      |
| 0,671302329 | MANGOSTIN TRIMETHYL ETHER                     |

|             |                                     |
|-------------|-------------------------------------|
| 0,670434514 | ARTHONIOIC ACID                     |
| 0,670392098 | BLASTICIDIN S                       |
| 0,668529995 | PIPLARTINE                          |
| 0,668183944 | SULFATHIAZOLE                       |
| 0,667819608 | PISCIDIC ACID                       |
| 0,667201321 | 3,4',5,6,7-PENTAMETHOXYFLAVONE      |
| 0,665802056 | FAMCICLOVIR                         |
| 0,664672922 | 2-AMINOGUANIDINE HEMISULFATE        |
| 0,66121131  | TIGOGENIN                           |
| 0,660168357 | PICROPODOPHYLLOTOXIN ACETATE        |
| 0,659055882 | XYLAZINE                            |
| 0,656177669 | METHOXYVONE                         |
| 0,654675975 | MEMANTINE HYDROCHLORIDE             |
| 0,653360235 | PENTACHLOROPHENOL                   |
| 0,653349109 | BACITRACIN                          |
| 0,652309681 | AGMATINE SULFATE                    |
| 0,650315473 | DIPHENYLUREA                        |
| 0,643187679 | TOTAROL                             |
| 0,640016183 | SECURININE                          |
| 0,639603964 | EXALAMIDE                           |
| 0,639249406 | PIROXICAM                           |
| 0,639021173 | CUNEATIN METHYL ETHER               |
| 0,638189464 | CHOLECALCIFEROL                     |
| 0,637256894 | DEXPANTHENOL                        |
| 0,635259751 | PRALIDOXIME MESYLATE                |
| 0,634326576 | CHENODIOL                           |
| 0,633678233 | PROXYPHYLLINE                       |
| 0,633612795 | GITOXIN                             |
| 0,632774397 | ACETARSOL                           |
| 0,630939556 | CEPHALOTHIN SODIUM                  |
| 0,628129171 | PYROCATECHUIC ACID                  |
| 0,625397948 | RUTILANTINONE                       |
| 0,625395372 | FENBUTYRAMIDE                       |
| 0,624090031 | DESOXYPEGANINE HYDROCHLORIDE        |
| 0,624059698 | FLUPHENAZINE HYDROCHLORIDE          |
| 0,623501911 | METHYLDOPATE HYDROCHLORIDE          |
| 0,623077224 | ACETYL-L-LEUCINE                    |
| 0,623007122 | EPHEDRINE (1R,2S) HYDROCHLORIDE     |
| 0,622946421 | AMANTADINE HYDROCHLORIDE            |
| 0,622103874 | CYCLOVERATRYLENE                    |
| 0,621072755 | VANCOMYCIN HYDROCHLORIDE            |
| 0,615901414 | QUERCETIN                           |
| 0,61571454  | PHENTERMINE                         |
| 0,613028457 | SAPPANONE A DIMETHYL ETHER          |
| 0,61037532  | CLOZAPINE                           |
| 0,610207183 | ALOIN                               |
| 0,609684708 | BEKANAMYCIN SULFATE                 |
| 0,609054627 | DEHYDRO (11,12)URSOLIC ACID LACTONE |
| 0,6087896   | 3,4'-DIHYDROXYFLAVONE               |
| 0,608417609 | PREDNISONE                          |
| 0,608324525 | EPIGALLOCATECHIN-3-MONOGALLATE      |
| 0,608078336 | SALSOLINE                           |



|             |                                     |
|-------------|-------------------------------------|
| 0,607237154 | THIOGUANINE                         |
| 0,606030282 | MEFEXAMIDE                          |
| 0,6048182   | ANAGRELIDE HYDROCHLORIDE            |
| 0,596370171 | HUPERZINE A                         |
| 0,595515925 | MELATONIN                           |
| 0,594586038 | 3-ISOBUTYL-1-METHYLXANTHINE (IBMX)  |
| 0,59191076  | LARIXOL ACETATE                     |
| 0,591843509 | LINAMARIN                           |
| 0,591541971 | ROFECOXIB                           |
| 0,591465156 | APIIN                               |
| 0,591035833 | COUMOPHOS                           |
| 0,590727132 | ACRIFLAVINIUM HYDROCHLORIDE         |
| 0,590015132 | HECOGENIN                           |
| 0,588745816 | SOLASODINE                          |
| 0,588600095 | UREA                                |
| 0,585807245 | alpha-TOCHOPHERYL ACETATE           |
| 0,584784149 | IRIDIN                              |
| 0,58473942  | LIOTHYRONINE                        |
| 0,581989473 | NAFCILLIN SODIUM                    |
| 0,580678168 | RESERPINE                           |
| 0,580615093 | CARBIDOPA                           |
| 0,579540631 | OBLIQUIN                            |
| 0,578759136 | EPIGALLOCATECHIN                    |
| 0,576967201 | MUNDULONE ACETATE                   |
| 0,576694107 | TYROTHRINICIN                       |
| 0,576332251 | PENTOXIFYLLINE                      |
| 0,572182109 | SULFANITRAN                         |
| 0,571575706 | PROBENECID                          |
| 0,571244471 | RETINYL PALMITATE                   |
| 0,567315477 | GUVACINE HYDROCHLORIDE              |
| 0,567154128 | BITHIONATE SODIUM                   |
| 0,566433326 | SPERMIDINE TRIHYDROCHLORIDE         |
| 0,565425196 | HYDROQUINONE                        |
| 0,564847794 | TETROQUINONE                        |
| 0,564321743 | PYRITINOL                           |
| 0,563869644 | GENTIAN VIOLET                      |
| 0,563678671 | METHYLPREDNISOLONE SODIUM SUCCINATE |
| 0,563651492 | AZOBENZENE                          |
| 0,561745715 | HYDROCOTARNINE HYDROBROMIDE         |
| 0,561506436 | 7,4'-DIHYDROXYFLAVONE               |
| 0,560791686 | ERYTHROSE                           |
| 0,560169831 | ATRAZINE                            |
| 0,55897189  | PHYTONADIONE                        |
| 0,555941017 | GINKGOLIC ACID                      |
| 0,555878465 | 5-CHLOROINDOLE-2-CARBOXYLIC ACID    |
| 0,553866956 | AKLOMIDE                            |
| 0,553664167 | CARBENICILLIN DISODIUM              |
| 0,553495672 | AVOCADYNE                           |
| 0,552353456 | MECYSTEINE HYDROCHLORIDE            |
| 0,550839603 | MEROGEDUNIN                         |
| 0,547147883 | ATROPINE SULFATE                    |
| 0,546666959 | p-FLUOROPHENYLALANINE               |

|             |                                                           |
|-------------|-----------------------------------------------------------|
| 0,545362502 | NORGESTIMATE                                              |
| 0,544230109 | BISABOLOL                                                 |
| 0,54384163  | 5-AMINOPENTANOIC ACID HYDROCHLORIDE                       |
| 0,542958834 | ALANYL-DI-LEUCINE                                         |
| 0,542298522 | CHLOROTRIANISENE                                          |
| 0,541818592 | TRIAMTERENE                                               |
| 0,536404872 | OXYPHENCYCLIMINE HYDROCHLORIDE                            |
| 0,534379321 | DROPROPIZINE                                              |
| 0,534274544 | DIBENZOTHIOPHENE                                          |
| 0,533447314 | 3,4-DIDESMETHYL-5-DESHYDROXY-3'-ETHOXYSCLEROIIN           |
| 0,532176624 | BETAHISTINE HYDROCHLORIDE                                 |
| 0,531749944 | 4,4'-DIISOTHIOCYANOSTILBENE-2,2'-SUFONIC ACID SODIUM SALT |
| 0,53105153  | FLUNARIZINE HYDROCHLORIDE                                 |
| 0,53038014  | RHODOCLADONIC ACID                                        |
| 0,529443665 | MENTHOL(-)                                                |
| 0,529151735 | DEOXYCHOLIC ACID                                          |
| 0,527092869 | ALBUTEROL (+/-)                                           |
| 0,52503698  | LEVOFLOXACIN                                              |
| 0,522257376 | SAPPANONE A TRIMETHYL ETHER                               |
| 0,52209621  | BRAZILIN                                                  |
| 0,521136849 | HYPOXANTHINE                                              |
| 0,517730486 | CHOLIC ACID                                               |
| 0,517730002 | CYSTAMINE DIHYDROCHLORIDE                                 |
| 0,517623043 | POLYMYXIN B SULFATE                                       |
| 0,517122231 | RAMIPRIL                                                  |
| 0,516647754 | GERANYLGERANIOL                                           |
| 0,513131291 | SINENSETIN                                                |
| 0,51260734  | SEMUSTINE                                                 |
| 0,510847986 | MINAPRINE HYDROCHLORIDE                                   |
| 0,510244204 | DEXCHLORPHENIRAMINE MALEATE                               |
| 0,509914766 | PROSCILLARIDIN                                            |
| 0,50966769  | MIGLITOL                                                  |
| 0,508016225 | CHLORHEXIDINE                                             |
| 0,507532682 | CHROMOCARB                                                |
| 0,507213032 | INOSITOL                                                  |
| 0,507120854 | NORFLOXACIN                                               |
| 0,504557121 | FAMOTIDINE                                                |
| 0,503859358 | 3,4-DIMETHOXYCINNAMIC ACID                                |
| 0,502510941 | OXCARBAZEPINE                                             |
| 0,501815752 | AZTREONAM                                                 |
| 0,500632082 | WARFARIN                                                  |
| 0,499505342 | DESLORATIDINE                                             |
| 0,499263477 | MECLOCYCLINE SULFOSALICYLATE                              |
| 0,499242887 | ACETYLCHOLINE                                             |
| 0,497637517 | beta-ESGIN                                                |
| 0,49668374  | VINDOLINE                                                 |
| 0,496299541 | CINNAMIC ACID                                             |
| 0,49554951  | CHOLINE CHLORIDE                                          |
| 0,494328236 | MOXIFLOXACIN HYDROCHLORIDE                                |
| 0,493414581 | HYDROXYCHLOROQUINE SULFATE                                |
| 0,492820183 | CEFACLOR                                                  |
| 0,492324483 | CARAPIN                                                   |

|             |                                                |
|-------------|------------------------------------------------|
| 0,49227866  | TROXERUTIN                                     |
| 0,490999007 | CEFOXITIN SODIUM                               |
| 0,489090371 | TRIACETIN                                      |
| 0,488669807 | ANTIPYRINE                                     |
| 0,488285291 | SULFASALAZINE                                  |
| 0,485427236 | HYMECROMONE METHYL ETHER                       |
| 0,483819166 | 4'-DEMETHYLEPIPODOPHYLLOTOXIN                  |
| 0,483033482 | OUABAIN                                        |
| 0,482857062 | NIMODIPINE                                     |
| 0,481639255 | 4-(3-BUTOXY-4-METHOXYBENZYL)IMIDAZOLIDIN-2-ONE |
| 0,481471355 | CIMETIDINE                                     |
| 0,481122731 | BICUCULLINE(-) METHIODIDE                      |
| 0,478749625 | URIDINE TRIPHOSPHATE TRISODIUM                 |
| 0,478028976 | N-FORMYLMETHIONYLPHENYLALANINE                 |
| 0,4765714   | ANHYDROGLUCOSE                                 |
| 0,470599375 | SINAPIC ACID METHYL ETHER                      |
| 0,470493701 | ESTRADIOL METHYL ETHER                         |
| 0,469371771 | TOLMETIN SODIUM                                |
| 0,468096953 | DEACETYLGEDUNIN                                |
| 0,465980739 | MELEZITOSE                                     |
| 0,464731789 | GLUTATHIONE                                    |
| 0,464584385 | BATYL ALCOHOL                                  |
| 0,463846121 | AZADIRACTIN                                    |
| 0,460145268 | ALPRENOLOL                                     |
| 0,459960015 | CLOFOCTOL                                      |
| 0,459311956 | PHYSCION                                       |
| 0,458869912 | DICTAMNINE                                     |
| 0,45883271  | UVAOL                                          |
| 0,457843069 | TRIPROLIDINE HYDROCHLORIDE                     |
| 0,45548409  | GLUCOSAMINE HYDROCHLORIDE                      |
| 0,455302481 | SOTALOL HYDROCHLORIDE                          |
| 0,454515241 | PHENOLPHTHALEIN                                |
| 0,448839206 | 2,4,5-TRICHLOROPHENOXYACETIC ACID              |
| 0,447159917 | CLOXACILLIN SODIUM                             |
| 0,446806526 | TRYPTOPHAN                                     |
| 0,445972808 | ONONETIN                                       |
| 0,444993907 | PENTETIC ACID                                  |
| 0,444687562 | ASARYLALDEHYDE                                 |
| 0,443727535 | TOTAROL-19-CARBOXYLIC ACID, METHYL ESTER       |
| 0,442560041 | LANATOSIDE C                                   |
| 0,440796688 | GINKGOLIDE A                                   |
| 0,440491732 | ISOPROPAMIDE IODIDE                            |
| 0,439931726 | CHLORDANE                                      |
| 0,437957891 | MEFENAMIC ACID                                 |
| 0,435268905 | IBUPROFEN                                      |
| 0,434698776 | EBSELEN                                        |
| 0,434461372 | SILIBININ                                      |
| 0,432280354 | GUAIAZULENE                                    |
| 0,432156212 | ISOSORBIDE DINITRATE                           |
| 0,431217456 | OXYMETAZOLINE HYDROCHLORIDE                    |
| 0,431195667 | 12a-HYDROXY-5-DEOXYDEHYDROMUNDUSERONE          |
| 0,43083963  | SULFAMETHOXYPYRIDAZINE                         |

|             |                                                    |
|-------------|----------------------------------------------------|
| 0,430769588 | CYCLOLEUCINE                                       |
| 0,427867929 | SULFAMONOMETHOXINE                                 |
| 0,426167882 | CARBACHOL                                          |
| 0,425981564 | FLUCONAZOLE                                        |
| 0,425603197 | BUPIVACAINE HYDROCHLORIDE                          |
| 0,421720374 | FOSFOMYCIN                                         |
| 0,419530544 | ROBUSTIC ACID                                      |
| 0,419517396 | LOVASTATIN                                         |
| 0,418660027 | ACETOHEXAMIDE                                      |
| 0,418069015 | METHYL ROBUSTONE                                   |
| 0,417718682 | THIAMYLAL SODIUM                                   |
| 0,417695117 | SULFADOXINE                                        |
| 0,416797342 | GLAFENINE                                          |
| 0,412084969 | 1-PHENYLBIGUANIDE HYDROCHLORIDE                    |
| 0,40818315  | NIFUROXAZIDE                                       |
| 0,407009609 | QUASSIN                                            |
| 0,406258872 | PERSEITOL                                          |
| 0,406157589 | ESTRADIOL ACETATE                                  |
| 0,405969483 | ISOLIQUIRITIGENIN                                  |
| 0,404647384 | LARIXOL                                            |
| 0,401470318 | LIQUIRITIGENIN DIMETHYL ETHER                      |
| 0,400379402 | TIMOLOL MALEATE                                    |
| 0,398541416 | SIMVASTATIN                                        |
| 0,398089496 | SODIUM DEHYDROCHOLATE                              |
| 0,397755558 | ALEURETIC ACID                                     |
| 0,39762356  | THEOBROMINE                                        |
| 0,397468653 | METHACYCLINE HYDROCHLORIDE                         |
| 0,396386397 | PROTIONAMIDE                                       |
| 0,396339729 | 3alpha-HYDROXY-3-DEOXYANGOLENSIC ACID METHYL ESTER |
| 0,395630599 | ATORVASTATIN CALCIUM                               |
| 0,393765457 | 1-AMINOCYCLOBUTANE CARBOXYLIC ACID                 |
| 0,392698619 | 2,6-DI-t-BUTYL-4-METHYLPHENOL                      |
| 0,392625125 | SKATOLE                                            |
| 0,391400597 | DIPTERYXIN                                         |
| 0,390457057 | SOLANESYL ACETATE                                  |
| 0,388344294 | 2',5'-DIHYDROXY-4-METHOXYCHALCONE                  |
| 0,386783286 | HESPERIDIN                                         |
| 0,38644202  | ALLANTOIN                                          |
| 0,386427276 | 1-(2-TRIFLUOROMETHYLPHENYL)IMIDAZOLE               |
| 0,384989099 | MEPHENESIN                                         |
| 0,383360841 | TETRANDRINE                                        |
| 0,381169953 | 3-OXOURSAN (28-13)OLIDE                            |
| 0,380780719 | HEXAMETHYLQUERCETAGETIN                            |
| 0,380100672 | DEHYDROABIETAMIDE                                  |
| 0,379361842 | SULFANILAMIDE                                      |
| 0,379045748 | INOSINE                                            |
| 0,378946967 | GALANTHAMINE HYDROBROMIDE                          |
| 0,378782695 | NIFEDIPINE                                         |
| 0,378679469 | HUMULENE (alpha)                                   |
| 0,376661278 | PIPERACILLIN SODIUM                                |
| 0,369012466 | RETINOL                                            |
| 0,368303764 | PEUCENIN                                           |

|             |                                                                                |
|-------------|--------------------------------------------------------------------------------|
| 0,366507037 | RANOLAZINE                                                                     |
| 0,365382783 | PHENYL AMINOSALICYLATE                                                         |
| 0,363879941 | SPAGLUMIC ACID                                                                 |
| 0,362546946 | ETHYL EVERNINATE                                                               |
| 0,359038784 | GLUCOSAMINIC ACID                                                              |
| 0,359029648 | DROPERIDOL                                                                     |
| 0,358596315 | RITODRINE HYDROCHLORIDE                                                        |
| 0,355850546 | 2',4'-DIHYDROXYCHALCONE 4'-GLUCOSIDE                                           |
| 0,355823701 | ARECOLINE HYDROBROMIDE                                                         |
| 0,35401115  | TILORONE                                                                       |
| 0,352422009 | TRIACETYLRISVERATROL                                                           |
| 0,352102954 | AMINOGLUTETHIMIDE                                                              |
| 0,351279421 | BRUCINE                                                                        |
| 0,350999437 | METHYLXANTHOXYLIN                                                              |
| 0,350867618 | AMRINONE                                                                       |
| 0,349761344 | 3beta-HYDROXY-23,24-BISNORCHOL-5-ENIC ACID                                     |
| 0,349042117 | PROADIFEN HYDROCHLORIDE                                                        |
| 0,348773065 | 2-METHOXY-5 (6)EPOXY-TETRAHYDROCARYOPHYLLENE                                   |
| 0,34737953  | HARMALINE                                                                      |
| 0,347180263 | DICYCLOMINE HYDROCHLORIDE                                                      |
| 0,346453151 | AMITRAZ                                                                        |
| 0,345774207 | KETOROLAC TROMETHAMINE                                                         |
| 0,343819177 | CEPHRADINE                                                                     |
| 0,343436544 | OXACILLIN SODIUM                                                               |
| 0,343036624 | RUBESCENSIN A                                                                  |
| 0,341687879 | GLIPIZIDE                                                                      |
| 0,341039637 | BROMHEXINE HYDROCHLORIDE                                                       |
| 0,338319039 | ZOPICLONE                                                                      |
| 0,33672443  | 3-BROMO-7-NITROINDAZOLE                                                        |
| 0,336010033 | COTININE                                                                       |
| 0,335294298 | AMINOHIPURIC ACID                                                              |
| 0,334784498 | EVOXINE                                                                        |
| 0,334540442 | CYPROTERONE                                                                    |
| 0,333163226 | UBIDECARENEONE                                                                 |
| 0,332609332 | INDAPAMIDE                                                                     |
| 0,332374965 | PHTHALYLSULFATHIAZOLE                                                          |
| 0,330044532 | TRIMETHOPRIM                                                                   |
| 0,329698514 | REPAGLINIDE                                                                    |
| 0,328731645 | 2-METHYL-4-(PIPERIDIN-1-YLCARBOXY)-5-ISOPROPYLPHENYLTRIMETHYLAMMONIUM CHLORIDE |
| 0,328657603 | CINOXACIN                                                                      |
| 0,327712866 | AMIFOSTINE                                                                     |
| 0,327289445 | NORSTICTIC ACID                                                                |
| 0,326378024 | BUTYL PARABEN                                                                  |
| 0,325988622 | MEPENZOLATE BROMIDE                                                            |
| 0,324979209 | ACETOSYRINGONE                                                                 |
| 0,324199799 | NEFOPAM                                                                        |
| 0,323832765 | DIENESTROL                                                                     |
| 0,322766939 | RIMANTADINE HYDROCHLORIDE                                                      |
| 0,32271576  | TRIGONELLINE                                                                   |
| 0,322073335 | ANETHOLE                                                                       |
| 0,321639611 | NETILMICIN SULFATE                                                             |
| 0,320920399 | CHOLEST-5-EN-3-ONE                                                             |

|             |                                   |
|-------------|-----------------------------------|
| 0,320587507 | PREGNENOLONE SULFATE, SODIUM SALT |
| 0,317485885 | PHLORIDZIN                        |
| 0,316994881 | DIOSMIN                           |
| 0,316888828 | IODIPAMIDE                        |
| 0,315277599 | RESORCINOL MONOACETATE            |
| 0,313934292 | IOPANIC ACID                      |
| 0,310519897 | CYCLOCREATINE                     |
| 0,309984464 | N-METHYLANTHRANILIC ACID          |
| 0,308439218 | KASUGAMYCIN HYDROCHLORIDE         |
| 0,307654322 | TOLAZAMIDE                        |
| 0,303803397 | NOBILETIN                         |
| 0,302653501 | EPIAFZELECHIN (2R,3R)(-)          |
| 0,301368796 | ETHYLNOREPINEPHRINE HYDROCHLORIDE |
| 0,300461252 | CELECOXIB                         |
| 0,300405176 | 6alpha-METHYLPREDNISOLONE ACETATE |
| 0,300142883 | HARMANE                           |
| 0,297303613 | METOCLOPRAMIDE HYDROCHLORIDE      |
| 0,297227311 | 3alpha-ACETOXYDIHYDRODEOXYGEDUNIN |
| 0,296385664 | IRBESARTAN                        |
| 0,295455965 | DAIDZEIN                          |
| 0,293324282 | CETYLPYRIDINIUM CHLORIDE          |
| 0,293105566 | ASIATIC ACID                      |
| 0,29176073  | BEPHENIUM HYDROXYNAPHTHOATE       |
| 0,291350402 | SULFAPHENAZOLE                    |
| 0,290409576 | NALTREXONE HYDROCHLORIDE          |
| 0,28981603  | BILIRUBIN                         |
| 0,28962158  | BLEOMYCIN (bleomycin B2 shown)    |
| 0,287227632 | SULFISOXAZOLE ACETYL              |
| 0,286547162 | LAGOCHILIN                        |
| 0,286504714 | LARIXINIC ACID                    |
| 0,285595774 | FRAXIDIN METHYL ETHER             |
| 0,285582635 | IRIGENIN                          |
| 0,285085474 | EPIANDROSTERONE                   |
| 0,28477178  | POMIFERIN                         |
| 0,283170889 | CARISOPRODOL                      |
| 0,282885764 | PAPAVERINE HYDROCHLORIDE          |
| 0,282679205 | TRIAMCINOLONE DIACETATE           |
| 0,28145106  | HEDERAGENIN                       |
| 0,281449535 | CEFUROXIME AXETIL                 |
| 0,280643593 | PIRENZEPINE HYDROCHLORIDE         |
| 0,279704683 | ROTENONIC ACID, METHYL ETHER      |
| 0,278636693 | PHENACETIN                        |
| 0,27794133  | QUINAPRIL HYDROCHLORIDE           |
| 0,277933782 | METARAMINOL BITARTRATE            |
| 0,270580427 | TROPICAMIDE                       |
| 0,26950152  | DIRITHROMYCIN                     |
| 0,265011101 | MUPIROCIN                         |
| 0,264835603 | LOGANIN                           |
| 0,263486474 | XANTHYLETIN                       |
| 0,262779587 | BACCATIN III                      |
| 0,261569644 | LIMONIN                           |
| 0,259517926 | THERMOPSINE PERCHLORATE           |

|             |                                                 |
|-------------|-------------------------------------------------|
| 0,25852951  | FLUROTHYL                                       |
| 0,257191084 | BENFLURALIN                                     |
| 0,256524097 | SPERMINE                                        |
| 0,255484708 | FENOPROFEN                                      |
| 0,255384521 | SALSOLIDINE                                     |
| 0,254939005 | PHENYTOIN SODIUM                                |
| 0,254894337 | SALICIN                                         |
| 0,253475568 | FIPRONIL                                        |
| 0,253106183 | SR-2640                                         |
| 0,251834709 | ESTRADIOL DIACETATE                             |
| 0,251493507 | p-CHLOROPHENYLALANINE                           |
| 0,24923149  | S-ISOCORYDINE (+)                               |
| 0,248788346 | PRIMULETIN                                      |
| 0,247476566 | SULPIRIDE                                       |
| 0,247434844 | SULFAGUANIDINE                                  |
| 0,245560692 | DEMETHYLNOBILETIN                               |
| 0,244504498 | TRIMIPRAMINE MALEATE                            |
| 0,242154467 | BENZOYLPAS                                      |
| 0,241462052 | VENLAFAXINE                                     |
| 0,237438627 | SULCONAZOLE NITRATE                             |
| 0,23486484  | NADOLOL                                         |
| 0,234519152 | HINOKITIOLOL                                    |
| 0,231201246 | 2-ACETYLPYRROLE                                 |
| 0,230938672 | CHRYSAROBIN                                     |
| 0,230938672 | 2,4-DICHLOROPHENOXYBUTYRIC ACID                 |
| 0,229886312 | ENILCONAZOLE                                    |
| 0,227614308 | NORETHINDRONE                                   |
| 0,226435843 | CARBOPLATIN                                     |
| 0,224878585 | HYDROXYPROGESTERONE                             |
| 0,224550079 | COSMOSIIN                                       |
| 0,224436993 | GATIFLOXACIN                                    |
| 0,223880186 | MODAFINIL                                       |
| 0,223653592 | ACEPROMAZINE MALEATE                            |
| 0,220987618 | POTASSIUM p-AMINOBEZOATE                        |
| 0,220471308 | LANOSTEROL ACETATE                              |
| 0,21937978  | CLONIDINE HYDROCHLORIDE                         |
| 0,218949867 | LINCOMYCIN HYDROCHLORIDE                        |
| 0,218054846 | DROFENINE HYDROCHLORIDE                         |
| 0,217203292 | DICHLORVOS                                      |
| 0,2169798   | METHYLENE BLUE                                  |
| 0,216122138 | NORSTICTIC ACID TRIACETATE                      |
| 0,21401789  | CHLORPROPAMIDE                                  |
| 0,213137665 | AZAPERONE                                       |
| 0,212075286 | LOBENDAZOLE                                     |
| 0,210287605 | 2,5-DI-t-BUTYL-4-HYDROXYANISOLE                 |
| 0,209588959 | N-PHENYLANTHRANILIC ACID                        |
| 0,207583315 | GABOXADOL HYDROCHLORIDE                         |
| 0,206781797 | PUERARIN                                        |
| 0,203491629 | N- (9-FLUORENYLMETHOXYCARBONYL)-L-LEUCINE       |
| 0,200747479 | PENTOBARBITAL                                   |
| 0,200735124 | MEXILETINE HYDROCHLORIDE                        |
| 0,199191566 | 1-HYDROXY-3,6,7-TRIMETHOXY-2,8-DIPRENYLXANTHONE |

|             |                                                        |
|-------------|--------------------------------------------------------|
| 0,199055689 | FENOFIBRATE                                            |
| 0,198927255 | STROPHANTHIDINIC ACID LACTONE ACETATE                  |
| 0,197890614 | PROGLUMIDE                                             |
| 0,196941783 | PHENYLETHYL ALCOHOL                                    |
| 0,19692952  | NAFRONYL OXALATE                                       |
| 0,19486217  | IFOSFAMIDE                                             |
| 0,193797208 | MENADIONE                                              |
| 0,192556328 | CHLORMADINONE ACETATE                                  |
| 0,189274864 | THIOTHIXENE                                            |
| 0,184793717 | PANTOTHENIC ACID(d) Na salt                            |
| 0,183575861 | BROMOCRIPTINE MESYLATE                                 |
| 0,181559514 | FRAXETIN                                               |
| 0,178366774 | BROMINDIONE                                            |
| 0,176330318 | ROLITETRACYCLINE                                       |
| 0,174709687 | ORLISTAT                                               |
| 0,174591699 | METHAMIDOPHOS                                          |
| 0,173110612 | RIFAXIMIN                                              |
| 0,173029179 | OMEGA-3-ACID ESTERS (EPA shown)                        |
| 0,171305414 | PTAEROXYLIN                                            |
| 0,168023505 | SEROTONIN HYDROCHLORIDE                                |
| 0,166415454 | AMINOCAPROIC ACID                                      |
| 0,166281056 | AURIN TRICARBOXYLIC ACID                               |
| 0,165956319 | XYLOSE                                                 |
| 0,164815526 | ERYSOLIN                                               |
| 0,162930484 | TRIMEPRAZINE TARTRATE                                  |
| 0,16204873  | AESCULIN                                               |
| 0,161836477 | GALLIC ACID                                            |
| 0,161727315 | KARANJIN                                               |
| 0,161222452 | 2,2'-AZO-bis-2-AMINOPROPANE                            |
| 0,160626905 | 7-OXOCHOLESTEROL                                       |
| 0,157916365 | RIBOSTAMYCIN SULFATE                                   |
| 0,157774318 | PHLORETIN                                              |
| 0,157203828 | ISOTRETINON                                            |
| 0,157063815 | PHENYLBUTYRIC ACID                                     |
| 0,156685597 | PHLORACETOPHENONE                                      |
| 0,155924976 | 2',3-DIHYDROXY-4,4',6'-TRIMETHOXYCHALCONE              |
| 0,153564902 | HOMOPTEROCARPIN                                        |
| 0,153547163 | TETRAHYDROSAPPANONE A TRIMETHYL ETHER                  |
| 0,152787042 | URETHANE                                               |
| 0,15033542  | ACTINONIN                                              |
| 0,150260488 | OXONITINE                                              |
| 0,149502366 | 3-BROMO-3,4,4-TRIMETHYL-3,4-DIHYDRODIAZETE-1.2-DIOXIDE |
| 0,1493924   | OFLOXACIN                                              |
| 0,148390214 | SUCRALOSE                                              |
| 0,147390983 | MINOXIDIL                                              |
| 0,144913835 | CEFUROXIME SODIUM                                      |
| 0,14344553  | TUAMINOHEPTANE SULFATE                                 |
| 0,142579671 | CHLORPROMAZINE                                         |
| 0,140924165 | DEOXYSAAPPANONE B TRIMETHYL ETHER                      |
| 0,135921346 | VALSARTAN                                              |
| 0,131953801 | 2-METHYL GRAMINE                                       |
| 0,131716041 | FOSFOSAL                                               |



|             |                                                                                             |
|-------------|---------------------------------------------------------------------------------------------|
| 0,13126826  | ATOVAQUONE                                                                                  |
| 0,1302895   | ZIDOVUDINE [AZT]                                                                            |
| 0,128741798 | FLUMEQUINE                                                                                  |
| 0,128498043 | FLUCYTOSINE                                                                                 |
| 0,126877053 | KYNURENINE                                                                                  |
| 0,126628613 | TERFENADINE                                                                                 |
| 0,126202432 | INDOPROFEN                                                                                  |
| 0,125654682 | MECAMYLAMINE HYDROCHLORIDE                                                                  |
| 0,125266689 | RIBAVIRIN                                                                                   |
| 0,1246955   | BOVINOCIDIN (3-nitropropionic acid)                                                         |
| 0,123638315 | 2-METHYLENE-5-(2,5-DIOXOTETRAHYDROFURAN-3-YL)-6-OXO--10,10-DIMETHYLBICYCLO[7: 2: 0]UNDECANE |
| 0,123272986 | MITOMYCIN C                                                                                 |
| 0,122136175 | 3,5-DIHYDROXYFLAVONE                                                                        |
| 0,120808673 | VIOLASTYRENE                                                                                |
| 0,119695019 | METHAPYRILENE HYDROCHLORIDE                                                                 |
| 0,11932138  | DALBERGIONE                                                                                 |
| 0,116867887 | TILMICOSIN                                                                                  |
| 0,115797728 | LEVOCARNITINE                                                                               |
| 0,115395955 | BAMBUTEROL HYDROCHLORIDE                                                                    |
| 0,115242081 | METHYLATROPINE NITRATE                                                                      |
| 0,11491967  | CONESSINE                                                                                   |
| 0,11253877  | LOSARTAN                                                                                    |
| 0,112070758 | DINITOLMIDE                                                                                 |
| 0,111460324 | SULFADIMETHOXINE                                                                            |
| 0,111178284 | PALMATINE                                                                                   |
| 0,110945654 | SULFANILATE ZINC                                                                            |
| 0,109922947 | ERYTHROMYCIN ESTOLATE                                                                       |
| 0,10858744  | 2',4-DIHYDROXYCHALCONE                                                                      |
| 0,108423721 | 2',4'-DIHYDROXY-4-METHOXYCHALCONE                                                           |
| 0,107602316 | METAMPICILLIN SODIUM                                                                        |
| 0,107284933 | BAICALEIN                                                                                   |
| 0,106813978 | 7-HYDROXYETHYLTHEOPHYLLINE                                                                  |
| 0,106680382 | CARBAMAZEPINE                                                                               |
| 0,10651748  | PRACTOLOL                                                                                   |
| 0,10550281  | MILTEFOSINE                                                                                 |
| 0,104655604 | VECURONIUM BROMIDE                                                                          |
| 0,104576267 | PILOCARPINE NITRATE                                                                         |
| 0,104570686 | LEVOBUNOLOL HYDROCHLORIDE                                                                   |
| 0,100417798 | D-LACTITOL MONOHYDRATE                                                                      |
| 0,098965775 | CEFOPERAZONE SODIUM                                                                         |
| 0,09804691  | BETULIN                                                                                     |
| 0,097882589 | BISANHYDRORUTILANTINONE                                                                     |
| 0,096885225 | BENDROFLUMETHIAZIDE                                                                         |
| 0,096736289 | CLOPIDOL                                                                                    |
| 0,096192957 | PIROMIDIC ACID                                                                              |
| 0,096015049 | ACETRIAZOIC ACID                                                                            |
| 0,094468227 | PAEONOL                                                                                     |
| 0,093642077 | TRIMETHOBENZAMIDE HYDROCHLORIDE                                                             |
| 0,093585295 | TENIPOSIDE                                                                                  |
| 0,09333534  | THIORIDAZINE HYDROCHLORIDE                                                                  |
| 0,090884743 | HAEMATOMMIC ACID                                                                            |
| 0,090246198 | CETIRIZINE HYDROCHLORIDE                                                                    |

|             |                                                            |
|-------------|------------------------------------------------------------|
| 0,089687399 | ANTIAROL                                                   |
| 0,089298199 | NICERGOLINE                                                |
| 0,087687334 | TOLPERISONE HYDROCHLORIDE                                  |
| 0,087270708 | MORANTEL CITRATE                                           |
| 0,084070186 | CARBINOXAMINE MALEATE                                      |
| 0,081443281 | GRISEOFULVIC ACID                                          |
| 0,081401825 | ESTRONE ACETATE                                            |
| 0,080391379 | URSINOIC ACID                                              |
| 0,080113146 | IRIGENIN TRIMETHYL ETHER                                   |
| 0,078103938 | 2,3-DIMERCAPTOSUCCINIC ACID                                |
| 0,077215779 | DICUMAROL                                                  |
| 0,076726389 | TOBRAMYCIN                                                 |
| 0,076699224 | FLUOXETINE                                                 |
| 0,073016893 | PERGOLIDE MESYLATE                                         |
| 0,070863261 | ENOXAPARIN SODIUM (1% wt/vol in 10%aq DMSO)                |
| 0,07071235  | BROMPHENIRAMINE MALEATE                                    |
| 0,070680425 | ETOMIDATE                                                  |
| 0,07051392  | DICHLORBENIL                                               |
| 0,07047742  | CLIDINIUM BROMIDE                                          |
| 0,069815795 | DEHYDROCHOLIC ACID                                         |
| 0,069780155 | STIGMASTEROL                                               |
| 0,069521055 | ENROFLOXACIN                                               |
| 0,069440239 | BUCLADESINE                                                |
| 0,068668586 | KETOCONAZOLE                                               |
| 0,067681585 | MONOCROTALINE                                              |
| 0,064279045 | ECONAZOLE NITRATE                                          |
| 0,064178685 | COLESEVALAM HYDROCHLORIDE (high mol wt copolymer @10mg/ml) |
| 0,062927989 | AVOBENZONE                                                 |
| 0,062108904 | CEFTIBUTEN                                                 |
| 0,059878508 | PREGNENOLONE                                               |
| 0,059517787 | XANTHURENIC ACID                                           |
| 0,058811268 | SULOCTIDIL                                                 |
| 0,058309841 | CLAVULANATE LITHIUM                                        |
| 0,056063899 | CHOLESTAN-3beta,5alpha,6beta-TRIOL                         |
| 0,055884439 | CEFAMANDOLE NAFATE                                         |
| 0,055497479 | ARISTOLOCHIC ACID                                          |
| 0,052969929 | EPICATECHIN PENTAACETATE                                   |
| 0,051343428 | 2,3,4-TRIHYDROXY-4'-ETHOXYBENZOPHENONE                     |
| 0,050794731 | BENZOIC ACID                                               |
| 0,050177412 | BORNEOL                                                    |
| 0,050155593 | SIROLIMUS                                                  |
| 0,049265212 | THIAMINE                                                   |
| 0,048200279 | GOSSYPIN                                                   |
| 0,047971108 | TRANLYCYPROMINE SULFATE                                    |
| 0,04756213  | NARINGIN                                                   |
| 0,047445929 | PRILOCAINE HYDROCHLORIDE                                   |
| 0,046040015 | ACACETIN                                                   |
| 0,044816964 | MENTHONE                                                   |
| 0,04343141  | FOMEPIZOLE HYDROCHLORIDE                                   |
| 0,043110211 | CITICOLINE                                                 |
| 0,043079177 | TRANEXAMIC ACID                                            |
| 0,043039266 | FLUFENAMIC ACID                                            |

|              |                                   |
|--------------|-----------------------------------|
| 0,040862986  | MORIN                             |
| 0,040471742  | SALVINORIN A                      |
| 0,04042943   | ZINC UNDECYLENATE                 |
| 0,040419559  | ANABASINE HYDROCHLORIDE           |
| 0,040196948  | HARPAGOSIDE                       |
| 0,039902755  | METAMECONINE                      |
| 0,039591946  | QUINOLINIC ACID                   |
| 0,038991309  | OLANZAPINE                        |
| 0,038990081  | AMINOCYCLOPROPANECARBOXYLIC ACID  |
| 0,038083456  | THIOSTREPTON                      |
| 0,037826176  | DONEPEZIL HYDROCHLORIDE           |
| 0,035631431  | MEBEVERINE HYDROCHLORIDE          |
| 0,035336258  | BETAMIPRON                        |
| 0,033362022  | TRIHEXYPHENIDYL HYDROCHLORIDE     |
| 0,031318592  | PERINDOPRIL ERBUMINE              |
| 0,02997906   | 18alpha-GLYCYRRHETINIC ACID       |
| 0,029296406  | S-(1,2-DICARBOXYETHYL)GLUTATHIONE |
| 0,028030354  | CEFDINIR                          |
| 0,02532542   | OXAPROZIN                         |
| 0,025207037  | NIACIN                            |
| 0,024299924  | CINCHONINE                        |
| 0,024081651  | SULFACHLORPYRIDAZINE              |
| 0,021759897  | FENDILINE HYDROCHLORIDE           |
| 0,021179015  | LOBELINE HYDROCHLORIDE            |
| 0,019991979  | CHLORMEZANONE                     |
| 0,01497422   | TAURINE                           |
| 0,012420299  | DIHYDROCELASTROL                  |
| 0,010671573  | AMINO BENZTROPINE                 |
| 0,010551421  | HARMOL HYDROCHLORIDE              |
| 0,010210763  | QUERCETIN PENTAMETHYL ETHER       |
| 0,00486927   | ISOGUVACINE HYDROCHLORIDE         |
| 0,004373181  | GEDUNOL                           |
| 0,002105881  | CAPSAICIN                         |
| 0,001810093  | 2',4'-DIHYDROXYCHALCONE           |
| 0,001736166  | FAMPRIDINE                        |
| 0,00141029   | RONNEL                            |
| 0,000255682  | TUBOCURARINE CHLORIDE             |
| 0,000150577  | PINDOLOL                          |
| -7,94789E-06 | TOLBUTAMIDE                       |
| -0,000972815 | PREDNISOLONE SODIUM PHOSPHATE     |
| -0,001513458 | CEFOTAXIME SODIUM                 |
| -0,002387538 | DEACETOXY(7)-7-OXOKHIVORINIC ACID |
| -0,003054162 | AZLOCILLIN SODIUM                 |
| -0,004198694 | TRICHLORMETHIAZIDE                |
| -0,006296287 | BENURESTAT                        |
| -0,006856926 | 6,4'-DIMETHOXYFLAVONE             |
| -0,007522289 | PTERYXIN                          |
| -0,008787464 | MYOSMINE                          |
| -0,010044743 | BRAZILEIN                         |
| -0,010128784 | PARTHENOLIDE                      |
| -0,010483774 | DIGOXIGENIN                       |
| -0,012806579 | SURAMIN                           |

|              |                                       |
|--------------|---------------------------------------|
| -0,013176027 | METHYSERGIDE MALEATE                  |
| -0,014317764 | DERACOXIB                             |
| -0,014368318 | ENALAPRIL MALEATE                     |
| -0,014421823 | NORCANTHARIDIN                        |
| -0,014901113 | PRAMOXINE HYDROCHLORIDE               |
| -0,016337644 | TRIFLUOPERAZINE HYDROCHLORIDE         |
| -0,016863833 | DIHYDROGEDUNINIC ACID, METHYL ESTER   |
| -0,016883191 | FOLIC ACID                            |
| -0,019852019 | 7,4'-DIMETHOXYISOFLAVONE              |
| -0,020782641 | RANITIDINE                            |
| -0,021415447 | PROPAZINE                             |
| -0,023647221 | DESACETYLCOLFORSIN                    |
| -0,023944868 | RIBOFLAVIN                            |
| -0,025732615 | TIOCONAZOLE                           |
| -0,026984375 | DICHLOROPHENE                         |
| -0,027618382 | ROSMARINIC ACID                       |
| -0,027681973 | CHOL-11-ENIC ACID                     |
| -0,030602545 | TICARCILLIN DISODIUM                  |
| -0,030972308 | MONENSIN SODIUM (monensin A is shown) |
| -0,031034433 | TRIFLURIDINE                          |
| -0,031915838 | PYRIDOXINE                            |
| -0,033557567 | ISOSORBIDE MONONITRATE                |
| -0,034129042 | ACEDAPSONE                            |
| -0,035162339 | PHYTOL                                |
| -0,037779224 | CEFAMANDOLE SODIUM                    |
| -0,040188756 | RONIDAZOLE                            |
| -0,040920378 | ISOFORMONONETIN                       |
| -0,041629849 | FLUDARABINE PHOSPHATE                 |
| -0,042382165 | ARSANILIC ACID                        |
| -0,042496798 | GLICLAZIDE                            |
| -0,043335687 | SHIKIMIC ACID                         |
| -0,044256773 | ADRENALINE BITARTRATE                 |
| -0,045026105 | BISMUTH SUBSALICYLATE                 |
| -0,046433861 | METHYSERGIDE                          |
| -0,047491492 | OLMESARTAN MEDOXOMIL                  |
| -0,050060725 | BUMETANIDE                            |
| -0,050791753 | MEGLUMINE                             |
| -0,052011665 | 3-DEACETYLKHIVORIN                    |
| -0,052932778 | CHUKRASIN METHYL ETHER                |
| -0,055739148 | HELICIN                               |
| -0,056496177 | PICROPODOPHYLLOTOXIN                  |
| -0,057627299 | CHLORZOXAZONE                         |
| -0,058295876 | DEHYDROROTENONE                       |
| -0,060655792 | CAFFEINE                              |
| -0,060716202 | FISSINOLIDE                           |
| -0,062318814 | ARTEMISININ                           |
| -0,062600296 | CAMPHOR (1R)                          |
| -0,062962755 | 4-METHYLDAPHNETIN                     |
| -0,06315335  | CREATININE                            |
| -0,06326788  | BUCETIN                               |
| -0,063351258 | L-ALANINOL                            |
| -0,066396415 | TANSHINONE IIA SULFONATE SODIUM       |

|              |                                        |
|--------------|----------------------------------------|
| -0,067335754 | BETAINE HYDROCHLORIDE                  |
| -0,067804856 | PANTHENOL                              |
| -0,068293823 | QUIPAZINE MALEATE                      |
| -0,069434341 | PIMOZIDE                               |
| -0,069903905 | THIOTEPA                               |
| -0,071612959 | DIMENHYDRINATE                         |
| -0,072878044 | PHENYLBUTYRATE SODIUM                  |
| -0,073668385 | ASCORBIC ACID                          |
| -0,073889672 | THIAMPHENICOL                          |
| -0,073968192 | EPICATECHIN MONOGALLATE                |
| -0,074017861 | UNDECYLENIC ACID                       |
| -0,07481207  | THALIDOMIDE                            |
| -0,074931783 | 2',4'-DIHYDROXY-6'-METHOXYACETOPHENONE |
| -0,07547391  | ERGOSTEROL                             |
| -0,07789739  | NICOTINYL ALCOHOL TARTRATE             |
| -0,07805755  | HYDROXYTACRINE MALEATE                 |
| -0,07811903  | NIMUSTINE                              |
| -0,079481191 | alpha-CYANO-3-HYDROXYCINNAMIC ACID     |
| -0,079996751 | MUNDOSERONE                            |
| -0,080265495 | SUCCINYLSULFATHIAZOLE                  |
| -0,080634505 | CEFPODOXIME PROXETIL                   |
| -0,081843657 | PIOGLITAZONE HYDROCHLORIDE             |
| -0,082169119 | CISPLATIN                              |
| -0,083566118 | BUPROPION                              |
| -0,08465319  | PIRENPERONE                            |
| -0,086082427 | LITHIUM CITRATE                        |
| -0,086166822 | NORSTICTIC ACID PENTAACETATE           |
| -0,088555406 | 21-ACETOXYPREGNENOLONE                 |
| -0,08877376  | 5alpha-ANDROSTAN-3,17-DIONE            |
| -0,089082291 | ATENOLOL                               |
| -0,089180884 | PYRAZINAMIDE                           |
| -0,090120242 | 7,2'-DIHYDROXYFLAVONE                  |
| -0,090126144 | 7,8-DIHYDROXYFLAVONE                   |
| -0,091737684 | DIFUCOL HEXAMETHYL ETHER               |
| -0,091985321 | DIACERIN                               |
| -0,092111656 | 4,4'-DIMETHOXYDALBERGIONE              |
| -0,094062065 | SANTONIN                               |
| -0,09431004  | DICLOXACILLIN SODIUM                   |
| -0,094547022 | LEVAMISOLE HYDROCHLORIDE               |
| -0,095837574 | SULFAMETER                             |
| -0,097835286 | LORATADINE                             |
| -0,09885988  | CYCLOTHIAZIDE                          |
| -0,099047807 | SUPROFEN METHYL ESTER                  |
| -0,099200389 | ETHOSUXIMIDE                           |
| -0,099892703 | ROCCELIC ACID                          |
| -0,100871953 | CEFSULODIN SODIUM                      |
| -0,101487498 | CEPHALOSPORIN C SODIUM                 |
| -0,104080302 | beta-SITOSTEROL                        |
| -0,10435332  | ARBUTIN                                |
| -0,105521947 | PANCURONIUM BROMIDE                    |
| -0,107133952 | TICLOPIDINE HYDROCHLORIDE              |
| -0,107219027 | ETHAMIVAN                              |

|              |                                                            |
|--------------|------------------------------------------------------------|
| -0,110085633 | HEXAMETHONIUM BROMIDE                                      |
| -0,110505292 | ANGOLENSIN (R)                                             |
| -0,110959832 | THEAFLAVIN                                                 |
| -0,111561092 | XANTHOPTERIN                                               |
| -0,112341542 | BENZYL ISOTHIOCYANATE                                      |
| -0,114369742 | OXELAIDIN CITRATE                                          |
| -0,115320258 | STROPHANTHIDIN                                             |
| -0,119242892 | CAPREOMYCIN SULFATE                                        |
| -0,120024053 | DANTROLENE SODIUM                                          |
| -0,120346833 | BUSULFAN                                                   |
| -0,120745252 | DIPERODON HYDROCHLORIDE                                    |
| -0,120871831 | TRIMETOZINE                                                |
| -0,122592361 | DEOXYADENOSINE                                             |
| -0,124151812 | ETHOXZOLAMIDE                                              |
| -0,124346798 | FOSCARNET SODIUM                                           |
| -0,125737946 | METHYLPHENIDATE HYDROCHLORIDE                              |
| -0,130090883 | ORSELLINIC ACID, ETHYL ESTER                               |
| -0,130100793 | FENSPIRIDE HYDROCHLORIDE                                   |
| -0,130719841 | MEFLOQUINE                                                 |
| -0,131152417 | 6-PHENYL-4-AZOBICYCLO[5.4.0]UNDECA-7,9,11-TRIENE-9,10-DIOL |
| -0,131830012 | PERPHENAZINE                                               |
| -0,13184153  | MEPIVACAINE HYDROCHLORIDE                                  |
| -0,133425075 | 10-HYDROXYCAMPTOTHECIN                                     |
| -0,134354182 | BUTACAINE                                                  |
| -0,136596731 | PANTETHINE                                                 |
| -0,13670294  | CARNOSIC ACID                                              |
| -0,136814258 | AVOCADANOFURAN                                             |
| -0,138385875 | 2,6-DIHYDROXY-4-METHOXYTOLUENE                             |
| -0,138557656 | EUPARIN                                                    |
| -0,138848632 | NAPROXOL                                                   |
| -0,139656269 | ERGOSTEROL ACETATE                                         |
| -0,139814666 | TIAPRIDE HYDROCHLORIDE                                     |
| -0,141841413 | DICHLORISONE ACETATE                                       |
| -0,141902207 | CRUSTECDYSONE                                              |
| -0,144900841 | RALOXIFENE HYDROCHLORIDE                                   |
| -0,147297047 | METERGOLINE                                                |
| -0,147875772 | KANAMYCIN A SULFATE                                        |
| -0,148104697 | LUPEOL                                                     |
| -0,150764816 | DOXAZOSIN MESYLATE                                         |
| -0,152394431 | GAMBOGIC ACID AMIDE                                        |
| -0,152833703 | SIBUTRAMINE HYDROCHLORIDE                                  |
| -0,153392431 | STRYCHNINE METHIODIDE                                      |
| -0,156137243 | ETOPOSIDE                                                  |
| -0,156371403 | SECNIDAZOLE                                                |
| -0,156454888 | TACROLIMUS                                                 |
| -0,156503713 | ALEXIDINE HYDROCHLORIDE                                    |
| -0,159984626 | TRICLOSAN                                                  |
| -0,160333207 | DIHYDROGAMBOGIC ACID                                       |
| -0,16059649  | PIMPINELLIN                                                |
| -0,161460566 | NIACINAMIDE                                                |
| -0,162324276 | ESTRADIOL BENZOATE                                         |
| -0,163676311 | DIOXYBENZONE                                               |

|              |                                                         |
|--------------|---------------------------------------------------------|
| -0,167073611 | CARPROFEN                                               |
| -0,167303826 | OLEANOLIC ACID ACETATE                                  |
| -0,167477715 | PHENFORMIN HYDROCHLORIDE                                |
| -0,168426269 | MESNA                                                   |
| -0,168568336 | MEPHENTERMINE SULFATE                                   |
| -0,168578102 | CEFTAZIDIME                                             |
| -0,16950759  | LAMOTRIGINE                                             |
| -0,171492838 | DICHLOROPROP                                            |
| -0,171801548 | HOMOSALATE                                              |
| -0,173212924 | SACCHARIN                                               |
| -0,175574121 | 2-BENZOYL-5-METHOXYBENZOQUINONE                         |
| -0,176349609 | FIPEXIDE HYDROCHLORIDE                                  |
| -0,176552523 | PACHYRRHIZIN                                            |
| -0,1767507   | 4-METHOXYDALBERGIONE                                    |
| -0,176913318 | NEROL                                                   |
| -0,178276386 | ACEMETACIN                                              |
| -0,180347687 | PANGAMIC ACID SODIUM                                    |
| -0,182197942 | LAWSONE                                                 |
| -0,182995229 | PERILLIC ACID (-)                                       |
| -0,185656721 | ZOLMITRIPTAN                                            |
| -0,18586041  | 7beta-HYDROXY-7-DESACETOXYKHIVORINIC ACID, METHYL ESTER |
| -0,186124603 | CEPHALEXIN                                              |
| -0,18615097  | CITALOPRAM                                              |
| -0,187586726 | FELBAMATE                                               |
| -0,187897369 | MIDODRINE HYDROCHLORIDE                                 |
| -0,189385912 | PANTOPRAZOLE                                            |
| -0,190778925 | PROPRANOLOL HYDROCHLORIDE (+/-)                         |
| -0,191760772 | CARYOPHYLLENE OXIDE                                     |
| -0,194051071 | 2,6-DIMETHOXYQUINONE                                    |
| -0,194629933 | OXOLINIC ACID                                           |
| -0,19584831  | CYCLOBENZAPRINE HYDROCHLORIDE                           |
| -0,195998175 | ISOXICAM                                                |
| -0,197581363 | PECTOLINARIN                                            |
| -0,19767903  | ENOXACIN                                                |
| -0,197984093 | BERGAPTOL                                               |
| -0,19911282  | CLORSULON                                               |
| -0,199417872 | GLUCONOLACTONE                                          |
| -0,20227059  | DIHYDROJASMONIC ACID                                    |
| -0,202487769 | AMINOPENTAMIDE                                          |
| -0,202864633 | NARINGENIN                                              |
| -0,203435917 | DAPHNETIN                                               |
| -0,204360977 | ROXITHROMYCIN                                           |
| -0,204530331 | LABETALOL HYDROCHLORIDE                                 |
| -0,205263803 | CINNARAZINE                                             |
| -0,205362845 | PERHEXILINE MALEATE                                     |
| -0,206576322 | EUPHOL                                                  |
| -0,206757641 | METHACHOLINE CHLORIDE                                   |
| -0,207065353 | ALAPROCLATE                                             |
| -0,207309674 | ESTROPIPATE                                             |
| -0,207672836 | GRAYANOTOXIN I                                          |
| -0,211733023 | DIATRIZOIC ACID                                         |
| -0,213139037 | ANISODAMINE                                             |

|              |                                                 |
|--------------|-------------------------------------------------|
| -0,214121259 | METHAZOLAMIDE                                   |
| -0,214352744 | SMILAGENIN                                      |
| -0,214911836 | GEMIFLOXACIN MESYLATE                           |
| -0,217104775 | CLOPIDOGREL SULFATE                             |
| -0,217755178 | L-DEOXYALLIIN                                   |
| -0,220487052 | PERUVOSIDE                                      |
| -0,220747235 | CEFMETAZOLE SODIUM                              |
| -0,222773389 | ALENDRONATE SODIUM                              |
| -0,223219769 | NATEGLINIDE                                     |
| -0,224189327 | DESMETHYLDIHYDROCAPSAICIN                       |
| -0,224500472 | 6,7-DIHYDROXYFLAVONE                            |
| -0,224975224 | 6,2'-DIMETHOXYFLAVONE                           |
| -0,225432813 | ETODOLAC                                        |
| -0,225864683 | DIHYDROXY (3alpha,12alpha)PREGNAN-20-ONE        |
| -0,2272475   | ALPINETIN METHYL ETHER                          |
| -0,22750384  | ISOTECTORIGENIN, 7-METHYL ETHER                 |
| -0,229984342 | ALFLUZOSIN                                      |
| -0,23070402  | AMINOLEVULINIC ACID HYDROCHLORIDE               |
| -0,232818882 | BENZOYL PEROXIDE                                |
| -0,234153315 | CIPROFLOXACIN                                   |
| -0,234753907 | TRIDESACETOXYKHIVORIN                           |
| -0,236640499 | GARCINOLIC ACID                                 |
| -0,236815821 | CAPOBENIC ACID                                  |
| -0,236888217 | SAFROLE                                         |
| -0,237745219 | BERBERINE CHLORIDE                              |
| -0,238506213 | SITAGLIPTIN                                     |
| -0,238536395 | FLOPROPIONE                                     |
| -0,239739086 | DECOQUINATE                                     |
| -0,241931975 | TOLFENAMIC ACID                                 |
| -0,241987595 | NISOLDIPINE                                     |
| -0,242771205 | NONIC ACID                                      |
| -0,24327779  | METHOPRENE (S)                                  |
| -0,245191343 | ASTRAGALOSIDE IV                                |
| -0,245946023 | THONZYLAMINE HYDROCHLORIDE                      |
| -0,246022982 | DALBERGIONE, 4-METHOXY-4'-HYDROXY-              |
| -0,246547028 | NIZATIDINE                                      |
| -0,246691126 | EDOXUDINE                                       |
| -0,247950197 | PAROXETINE HYDROCHLORIDE                        |
| -0,249079991 | ACETYL TYROSINE ETHYL ESTER                     |
| -0,249897974 | CHLOROXINE                                      |
| -0,251390535 | NOSCAPINE HYDROCHLORIDE                         |
| -0,252544876 | PIRACETAM                                       |
| -0,252660791 | 4'-HYDROXYCHALCONE                              |
| -0,253872396 | ADIPHENINE HYDROCHLORIDE                        |
| -0,254788583 | TETRAMIZOLE HYDROCHLORIDE                       |
| -0,257106991 | NILUTAMIDE                                      |
| -0,25846572  | IMPERATORIN                                     |
| -0,258841168 | 2,4,5-TRICHLOROPHENOXYACETIC ACID, METHYL ESTER |
| -0,259581104 | EPI(13)TORULOSOL                                |
| -0,25978539  | ISOSAFROLE                                      |
| -0,262720589 | KOPARIN                                         |
| -0,263426429 | beta-CARYOPHYLLENE ALCOHOL                      |



|              |                                                             |
|--------------|-------------------------------------------------------------|
| -0,264978511 | BENZYL BENZOATE                                             |
| -0,264997725 | PHTHALYSULFATHIAZOLE                                        |
| -0,265080312 | CORYNANTHINE                                                |
| -0,266404411 | 3,4'-DIMETHOXYFLAVONE                                       |
| -0,268161786 | TROLEANDOMYCIN                                              |
| -0,269677423 | 2-(N,N-DIETHYLAMINO)DIAZENOLATE-2-OXIDE DIETHYLAMONIUM SALT |
| -0,269732205 | OXIDOPAMINE HYDROCHLORIDE                                   |
| -0,27004517  | 11a-ACETOXYPROGESTERONE                                     |
| -0,27061969  | ELLAGIC ACID                                                |
| -0,270742248 | BIPERIDEN                                                   |
| -0,271067795 | TERBINAFINE HYDROCHLORIDE                                   |
| -0,271704447 | LEOIDIN                                                     |
| -0,271852686 | 3-HYDROXYTYRAMINE                                           |
| -0,272088893 | BROXYQUINOLINE                                              |
| -0,274973801 | SENNOSIDE A                                                 |
| -0,27612183  | TRIFLUPROMAZINE HYDROCHLORIDE                               |
| -0,27676574  | DUARTIN, DIMETHYL ETHER                                     |
| -0,278175502 | ACETYLGLUTAMIC ACID                                         |
| -0,279726571 | CHRYSANTHEMIC ACID                                          |
| -0,280550412 | CACODYLIC ACID                                              |
| -0,283240847 | CROTAMITON                                                  |
| -0,283432319 | BENZOXYQUINE                                                |
| -0,284284861 | ANCITABINE HYDROCHLORIDE                                    |
| -0,286244876 | ISOPEONOL                                                   |
| -0,286792599 | CEFPROZIL                                                   |
| -0,286946754 | ALTRENOGEST                                                 |
| -0,287752994 | LOPERAMIDE HYDROCHLORIDE                                    |
| -0,28787389  | IRIGENIN, 7-BENZYL ETHER                                    |
| -0,289775466 | NYLIDRIN HYDROCHLORIDE                                      |
| -0,290701439 | CATECHIN PENTAACETATE                                       |
| -0,290732963 | PIPERAZINE                                                  |
| -0,29159765  | ELETRIPTAN HYDROBROMIDE                                     |
| -0,293275131 | ETHISTERONE                                                 |
| -0,293899648 | PIPERIDOLATE HYDROCHLORIDE                                  |
| -0,295405713 | METHYL PARATHIONE                                           |
| -0,298046172 | VINCAMINE                                                   |
| -0,299162849 | BIOTIN                                                      |
| -0,299896146 | CARVEDILOL                                                  |
| -0,303099638 | CHLOROPHYLLIDE Cu COMPLEX Na SALT                           |
| -0,30483786  | CYMARIN                                                     |
| -0,305819215 | OXFENDAZOLE                                                 |
| -0,306980059 | OXYPHENONIUM BROMIDE                                        |
| -0,308645654 | JUGLONE                                                     |
| -0,308848122 | FLUORESC EIN                                                |
| -0,308984957 | PYRIDOSTIGMINE BROMIDE                                      |
| -0,31040729  | SILDENAFIL                                                  |
| -0,311731239 | CEFDITORIN PIVOXIL                                          |
| -0,311971439 | ALGESTERONE ACETOPHENIDE                                    |
| -0,313083877 | PHENETHYL CAFFEATE (CAPE)                                   |
| -0,313167878 | 6,4'-DIHYDROXYFLAVONE                                       |
| -0,313690766 | BEZAFIBRATE                                                 |
| -0,315344596 | ACETYLTRYPHOPHANAMIDE                                       |

|              |                                                     |
|--------------|-----------------------------------------------------|
| -0,317087216 | OSAJIN                                              |
| -0,317487273 | TELMISARTAN                                         |
| -0,323151157 | FLUOROMETHOLONE                                     |
| -0,323566861 | BENFLUOREX HYDROCHLORIDE                            |
| -0,323669779 | VULPINIC ACID                                       |
| -0,323866247 | DOXYCYCLINE HYDROCHLORIDE                           |
| -0,325412289 | SERTRALINE HYDROCHLORIDE                            |
| -0,325759249 | LIOTHYRONINE (L- isomer) SODIUM                     |
| -0,326233837 | SPIPERONE                                           |
| -0,326583136 | SUMATRIPTAN                                         |
| -0,327445275 | N-METHYLBENZYLAMINE HYDROCHLORIDE                   |
| -0,328745646 | TINIDAZOLE                                          |
| -0,328867897 | DIETHYLSTILBESTROL                                  |
| -0,334827415 | ABSCISIC ACID (cis,trans; +/-)                      |
| -0,335273989 | PEONOL METHYL ETHER                                 |
| -0,335653622 | 6,7-DICHLORO-3-HYDROXY-2-QUINOXALINECARBOXYLIC ACID |
| -0,335991791 | CITROPTEN                                           |
| -0,336213952 | PEFLOXACINE MESYLATE                                |
| -0,336708767 | 3beta-HYDROXYDEOXODIHYDRODEOXYGEDUNIN               |
| -0,336964273 | ACETYLPHENYLALANINE                                 |
| -0,337267102 | ESCULETIN                                           |
| -0,338521836 | MARMESIN ACETATE                                    |
| -0,339789181 | SELAMECTIN                                          |
| -0,340220309 | ALLOXAN                                             |
| -0,340816599 | OXYBENZONE                                          |
| -0,341283379 | ALTRETAMINE                                         |
| -0,344825874 | ITRACONAZOLE                                        |
| -0,34624556  | GANGALEOIDIN                                        |
| -0,346722281 | ASCORBYL PALMITATE                                  |
| -0,348616595 | CYTISINE                                            |
| -0,348626531 | TOPIRAMATE                                          |
| -0,349617657 | N-ACETYLNEURAMIC ACID                               |
| -0,351875634 | FLOXURIDINE                                         |
| -0,353990003 | HEMATEIN                                            |
| -0,354103462 | AKLAVINE HYDROCHLORIDE                              |
| -0,3567316   | RABEPRAZOLE SODIUM                                  |
| -0,361312816 | PEONIFLORIN                                         |
| -0,362108167 | KYNURENIC ACID                                      |
| -0,362157604 | DICHLORODIPHENYLTRICHLOROETHANE                     |
| -0,362806455 | SUCCINYLACETONE                                     |
| -0,363641546 | BENZYLAMINE HYDROCHLORIDE                           |
| -0,366258821 | ALISKIREN HEMIFUMARATE                              |
| -0,367046622 | CLIOQUINOL                                          |
| -0,370400068 | EPIAFZELECHIN TRIMETHYL ETHER                       |
| -0,371497964 | OXANTEL PAMOATE                                     |
| -0,373141971 | DECAHYDROGAMBOGIC ACID                              |
| -0,375631628 | OXETHAZAINE                                         |
| -0,376890161 | DIHYDROMYRISTICIN                                   |
| -0,381851362 | BETA-PROPIOLACTONE                                  |
| -0,381984508 | PIPAMPERONE                                         |
| -0,382054877 | XANTHOXYLIN                                         |
| -0,385631957 | CLOFAZIMINE                                         |

|              |                                                         |
|--------------|---------------------------------------------------------|
| -0,385761012 | COLISTIN SULFATE                                        |
| -0,385821992 | TOLTRAZURIL                                             |
| -0,386304241 | 3-AMINO-beta-PINENE                                     |
| -0,387346864 | PHENYLMERCURIC ACETATE                                  |
| -0,387913244 | CEFONICID SODIUM                                        |
| -0,390814648 | CYCLOHEXIMIDE                                           |
| -0,393394814 | CAMPTOTHECIN                                            |
| -0,393805324 | ANHYDROBRAZILIC ACID                                    |
| -0,397210509 | GLYCOPYRROLATE                                          |
| -0,402226126 | AGELASINE (stereochemistry of diterpene unknown)        |
| -0,405185043 | LACCAIC ACID A                                          |
| -0,406340185 | LOMEFLOXACIN HYDROCHLORIDE                              |
| -0,40678194  | LEVALBUTEROL HYDROCHLORIDE                              |
| -0,407328555 | O-BENZYL-L-SERINE                                       |
| -0,411750581 | RAMELTEON                                               |
| -0,416013913 | 3,6-DIMETHOXYFLAVONE                                    |
| -0,416335672 | OMEPRAZOLE                                              |
| -0,417788171 | TEICOPLANIN [A(2-1) shown]                              |
| -0,420557535 | QUERCETIN TETRAMETHYL (5,7,3',4') ETHER                 |
| -0,421566801 | RIBOFLAVIN 5-PHOSPHATE SODIUM                           |
| -0,422339116 | BROMO-3-HYDROXY-4-(SUCCIN-2-YL)-CARYOLANE gamma-LACTONE |
| -0,423850561 | CLONAZEPAM                                              |
| -0,424061229 | NATAMYCIN                                               |
| -0,424072061 | APIGENIN DIMETHYL ETHER                                 |
| -0,425878423 | LAPPACONITINE                                           |
| -0,428857055 | FEXOFENADINE HYDROCHLORIDE                              |
| -0,42931953  | RIZATRIPTAN BENZOATE                                    |
| -0,4293831   | CARMINIC ACID                                           |
| -0,430398895 | EZETIMIBE                                               |
| -0,432929317 | ALANYL-di-PHENYLALANINE                                 |
| -0,436080996 | 6,3'-DIMETHOXYFLAVONE                                   |
| -0,436759392 | GLUCITOL-4-GUCOPYANOSIDE                                |
| -0,438428162 | HYCANTHONE                                              |
| -0,439504565 | OBTUSAQUINONE                                           |
| -0,440465712 | 3-METHYLORSELLINIC ACID                                 |
| -0,442195627 | VERAPAMIL HYDROCHLORIDE                                 |
| -0,442345978 | CHLOROCRESOL                                            |
| -0,443274961 | EUCATROPINE HYDROCHLORIDE                               |
| -0,443632103 | THYMOQUINONE                                            |
| -0,444491816 | AJMALINE                                                |
| -0,445267038 | QUETIAPINE                                              |
| -0,445397899 | PROPARACAINE HYDROCHLORIDE                              |
| -0,44612318  | CHLORPROTHIXENE HYDROCHLORIDE                           |
| -0,446458814 | GIBBERELIC ACID                                         |
| -0,446578953 | CELLOBIOSE (D[+])                                       |
| -0,450488268 | MEBHYDROLIN NAPHTHALENESULFONATE                        |
| -0,451584355 | DIMAPRIT DIHYDROCHLORIDE                                |
| -0,452824872 | FINASTERIDE                                             |
| -0,454687373 | PIZOTYLIN MALATE                                        |
| -0,461413094 | FORMESTANE                                              |
| -0,463076085 | ACACETIN DIACETATE                                      |
| -0,464662723 | GLYPHOSATE                                              |

|              |                                                   |
|--------------|---------------------------------------------------|
| -0,466491344 | OXICONAZOLE NITRATE                               |
| -0,467528469 | METFORMIN HYDROCHLORIDE                           |
| -0,467729126 | 13-METHYL-4,4-BISNOR-8,11,13-PODOCARPATRIEN-3-ONE |
| -0,470984059 | QUERCITRIN                                        |
| -0,473568836 | THIOCTIC ACID                                     |
| -0,475969311 | IRETOL                                            |
| -0,479769534 | LOBARIC ACID                                      |
| -0,480090994 | NAPROXEN(+)                                       |
| -0,481628471 | LECANORIC ACID                                    |
| -0,482491834 | FISETIN                                           |
| -0,482602374 | TETRAC                                            |
| -0,483715944 | DILOXANIDE FUROATE                                |
| -0,484015645 | ORNIDAZOLE                                        |
| -0,484653486 | HALOTHANE                                         |
| -0,485163529 | CEFTRIAZONE SODIUM TRIHYDRATE                     |
| -0,486474337 | PENFLURIDOL                                       |
| -0,486592028 | DIHYDROTANSHINONE I                               |
| -0,487290566 | MESALAMINE                                        |
| -0,496217168 | CHLORTHALIDONE                                    |
| -0,496616906 | TETRAHYDROPALMATINE                               |
| -0,498094452 | PARAMETHADIONE                                    |
| -0,499694526 | KOBUSONE                                          |
| -0,500923452 | SCOPOLETIN                                        |
| -0,502565298 | AMYGDALIN                                         |
| -0,508148038 | CELASTROL                                         |
| -0,510472791 | ETIDRONATE DISODIUM                               |
| -0,517921741 | ESTRADIOL-3-SULFATE, SODIUM SALT                  |
| -0,518760851 | PHENOTHRIN                                        |
| -0,521909676 | CHLORAMPHENICOL HEMISUCCINATE                     |
| -0,524000624 | NEROLIDOL                                         |
| -0,525109229 | NITRENDIPINE                                      |
| -0,529369028 | ABIETIC ACID                                      |
| -0,529770569 | ABRINE (L)                                        |
| -0,530452164 | ACAMPROSATE CALCIUM                               |
| -0,53414015  | CADAVERINE TARTRATE                               |
| -0,53792715  | PREGNENOLONE SUCCINATE                            |
| -0,539957521 | 18-AMINOABIETA-8,11,13-TRIENE SULFATE             |
| -0,543758464 | FLORFENICOL                                       |
| -0,543860107 | AVOCADENOFURAN                                    |
| -0,544164895 | L-LEUCYL-L-ALANINE                                |
| -0,54448484  | DUARTIN (-)                                       |
| -0,548924583 | BERGAPTEN                                         |
| -0,549642206 | TULOBUTEROL                                       |
| -0,5513204   | THEAFLAVIN DIGALLATE                              |
| -0,551560126 | ABAMECTIN                                         |
| -0,553086505 | CAMYLOFINE DIHYDROCHLORIDE                        |
| -0,55310403  | 4-METHYLESCULETIN                                 |
| -0,555586342 | OXYQUINOLINE HEMISULFATE                          |
| -0,556067657 | NONOXYNOL-9                                       |
| -0,557330618 | AZELASTINE HYDROCHLORIDE                          |
| -0,560462267 | CHRYSANTHEMYL ALCOHOL                             |
| -0,567031092 | 2-HYDROXY-3,4-DIMETHOXYBENZOIC ACID               |

|              |                                                     |
|--------------|-----------------------------------------------------|
| -0,567585258 | CARNITINE (dl) HYDROCHLORIDE                        |
| -0,567722534 | RESVERATROL                                         |
| -0,567960858 | gamma-AMINOBUTYRIC ACID                             |
| -0,568262444 | N-HYDROXYMETHYLNICOTINAMIDE                         |
| -0,570180261 | FUMAZENIL                                           |
| -0,570618298 | ISOBUTYLMETHYLXANTHINE                              |
| -0,572024106 | EUPHORBIASTEROID                                    |
| -0,574327693 | ANABASAMINE HYDROCHLORIDE                           |
| -0,57505189  | AMIPRILOSE                                          |
| -0,575412583 | TRIENTINE HYDROCHLORIDE                             |
| -0,578672326 | ARCAINE SULFATE                                     |
| -0,579846249 | STIGMASTA-4,22-DIEN-3-ONE                           |
| -0,580032565 | NIPECOTIC ACID                                      |
| -0,581673376 | APRAMYCIN                                           |
| -0,583882336 | CANDESARTAN CILEXTIL                                |
| -0,585456033 | DIGITONIN                                           |
| -0,587201083 | ETHYNODIOL DIACETATE                                |
| -0,590971027 | DIETHYLTOLUAMIDE                                    |
| -0,593915863 | MANDELIC ACID, METHYL ESTER                         |
| -0,5959848   | RHETSININE                                          |
| -0,600149933 | VARDENAFIL HYDROCHLORIDE                            |
| -0,602553283 | ZIMELDINE HYDROCHLORIDE                             |
| -0,603486277 | ISOETHARINE MESYLATE                                |
| -0,60555267  | TETRAHYDROGAMBOGIC ACID                             |
| -0,605734443 | 7-DESHYDROXYPYROGALLIN-4-CARBOXYLIC ACID            |
| -0,608077971 | CADIN-4-EN-10-OL                                    |
| -0,610066867 | HAEMATOXYLIN                                        |
| -0,611518749 | 12a-HYDROXY-9-DEMETHYLMUNDUSERONE-8-CARBOXYLIC ACID |
| -0,612879233 | ACETYLGLUCOSAMINE                                   |
| -0,613036104 | TENOXCAM                                            |
| -0,616853418 | PHENYLEPHRINE HYDROCHLORIDE                         |
| -0,617101076 | SALINOMYCIN, SODIUM                                 |
| -0,617130357 | CANTHARIDIN                                         |
| -0,62282186  | DESACETYL (7)KHIVORINIC ACID, METHYL ESTER          |
| -0,630180065 | ETHAVERINE HYDROCHLORIDE                            |
| -0,633640176 | 3-METHYLXANTHINE                                    |
| -0,635158309 | TACRINE HYDROCHLORIDE                               |
| -0,637322558 | DIMETHADIONE                                        |
| -0,64506995  | METOLAZONE                                          |
| -0,646757465 | VERATRIC ACID                                       |
| -0,647275124 | DENATONIUM BENZOATE                                 |
| -0,649078219 | AMIODARONE HYDROCHLORIDE                            |
| -0,649450225 | ROTENONE                                            |
| -0,649842553 | APHYLIC ACID                                        |
| -0,651573169 | BENZBROMARONE                                       |
| -0,652671447 | KYNURAMINE                                          |
| -0,654049242 | TOMATINE                                            |
| -0,654237663 | LEVULINIC ACID, 3-BENZYLIDENYL-                     |
| -0,657331407 | METHOXAMINE HYDROCHLORIDE                           |
| -0,657868918 | RILUZOLE                                            |
| -0,65845466  | CLOMIPRAMINE HYDROCHLORIDE                          |
| -0,658665155 | CYPROHEPTADINE HYDROCHLORIDE                        |

|              |                                             |
|--------------|---------------------------------------------|
| -0,65972211  | CYCLOSPORINE                                |
| -0,660334997 | BIFONAZOLE                                  |
| -0,668497509 | TRICLABENDAZOLE                             |
| -0,670580109 | GABAPENTIN                                  |
| -0,671535296 | ACETYLTRYPTOPHAN                            |
| -0,675643697 | NEOHESPERIDIN DIHYDROCHALCONE               |
| -0,675658791 | DIPLOSALSALATE                              |
| -0,678796667 | AMSACRINE                                   |
| -0,679231317 | AGARIC ACID                                 |
| -0,680377873 | HAEMATOMMIC ACID, ETHYL ESTER               |
| -0,68170306  | COTARNINE CHLORIDE                          |
| -0,687214931 | SALIDROSIDE                                 |
| -0,687571658 | STICTIC ACID                                |
| -0,68820809  | SARAFLOXACIN HYDROCHLORIDE                  |
| -0,689170049 | CILOSTAZOL                                  |
| -0,691656799 | CHOLESTANE                                  |
| -0,695345271 | VINCRISTINE SULFATE                         |
| -0,695945977 | CHRYSIN                                     |
| -0,696031115 | BUSPIRONE HYDROCHLORIDE                     |
| -0,696318928 | AMOXAPINE                                   |
| -0,697350822 | TRIFLURALIN                                 |
| -0,699571658 | PHTHALYLSULFACETAMIDE                       |
| -0,705758652 | TRICHLORFON                                 |
| -0,706731192 | RISEDRONATE SODIUM HYDRATE                  |
| -0,70677101  | ARTENIMOL                                   |
| -0,707279323 | BISOPROLOL FUMARATE                         |
| -0,70891157  | CRYPTOTANSHINONE                            |
| -0,715019858 | CHAULMOOGRIC ACID, ETHYL ESTER              |
| -0,721741216 | CANRENONE                                   |
| -0,723845798 | CHRYSOPHANOL                                |
| -0,724537183 | PARAROSANILINE PAMOATE                      |
| -0,725817092 | ANDROSTA-1,4-DIEN-3,17-DIONE                |
| -0,730819203 | QUEBRACHITOL                                |
| -0,732821789 | ARIPIRAZOLE                                 |
| -0,735348351 | ASPARTAME                                   |
| -0,744183348 | METHIMAZOLE                                 |
| -0,744512951 | CARBOFURAN                                  |
| -0,748103594 | FAMPROFAZONE                                |
| -0,758264724 | TRICHLORMETHINE                             |
| -0,765729009 | ASTEMIZOLE                                  |
| -0,769470642 | ARSENIC TRIOXIDE                            |
| -0,77178683  | N-ACETYLPROLINE                             |
| -0,772139053 | CHLOROGUANIDE HYDROCHLORIDE                 |
| -0,772487494 | PREGABALIN                                  |
| -0,774468272 | ALRESTATIN                                  |
| -0,775307259 | DERRUSNIN                                   |
| -0,785371483 | TANSHINONE IIA                              |
| -0,787018662 | PIPERIC ACID                                |
| -0,787833109 | 8-CYCLOPENTYLTHEOPHYLLINE                   |
| -0,789987742 | LEUCOVORIN CALCIUM                          |
| -0,80099155  | METHYL 7-DESHYDROXYPYROGALLIN-4-CARBOXYLATE |
| -0,806586274 | ZILEUTON                                    |

|              |                                                       |
|--------------|-------------------------------------------------------|
| -0,820760666 | METHOXYAMINE HYDROCHLORIDE                            |
| -0,843399396 | PIMETHIXENE MALEATE                                   |
| -0,847902098 | ISOBERGAPTENE                                         |
| -0,852128108 | CYTIDINE                                              |
| -0,853509434 | N-METHYLISOLEUCINE                                    |
| -0,861470474 | ACARBOSE                                              |
| -0,865628996 | OCTOPAMINE HYDROCHLORIDE                              |
| -0,867648927 | NIALAMIDE                                             |
| -0,868612763 | ACECAINIDE HYDROCHLORIDE                              |
| -0,873810853 | DIGITOXIN                                             |
| -0,876416271 | PROTRYPTYLINE HYDROCHLORIDE                           |
| -0,879162159 | BENZETHONIUM CHLORIDE                                 |
| -0,880344904 | FURALTADONE                                           |
| -0,887686269 | TOREMIPHENE CITRATE                                   |
| -0,9090411   | DARIFENACIN HYDROBROMIDE                              |
| -0,925853539 | DIMETHYL 4,4- <i>o</i> -PHENYLENE-BIS (3-THIOPHANATE) |
| -0,928432292 | PROPARGITE                                            |
| -0,933523242 | CETRIMONIUM BROMIDE                                   |
| -0,934704933 | ISOPIMPINELLIN                                        |
| -0,939224487 | CAFESTOL ACETATE                                      |
| -0,940546099 | DIHYDROSTREPTOMYCIN SULFATE                           |
| -0,955711816 | 1-MONOPALMITIN                                        |
| -0,960476082 | ISORESERPINE                                          |
| -0,96219849  | ANTIMYCIN A (A1 shown)                                |
| -0,963442183 | CORTISONE                                             |
| -0,970980802 | PHENOXYBENZAMINE HYDROCHLORIDE                        |
| -0,971564285 | PRAVASTATIN SODIUM                                    |
| -0,97301523  | CLEMASTINE                                            |
| -0,997479526 | MIANSERIN HYDROCHLORIDE                               |
| -1,014108682 | BROMPERIDOL                                           |
| -1,01969221  | ACETAMINOSALOL                                        |
| -1,021689464 | MECHLORETHAMINE                                       |
| -1,028676231 | LEVODOPA                                              |
| -1,040040642 | FUMARPROTOCETRARIC ACID                               |
| -1,041492535 | 3-AMINOPROPANESULPHONIC ACID                          |
| -1,055669546 | DIHYDROJASMONIC ACID, METHYL ESTER                    |
| -1,06054934  | EPIGALLOCATECHIN 3,5-DIGALLATE                        |
| -1,071544065 | HOMIDIUM BROMIDE                                      |
| -1,092699608 | VESAMICOL HYDROCHLORIDE                               |
| -1,114103352 | 4-NONYLPHENOL                                         |
| -1,121852305 | DIHYDROROTENONE                                       |
| -1,131167437 | ISOROTENONE                                           |
| -1,132070745 | CHOLESTERYL ACETATE                                   |
| -1,141189725 | DIHYDROERGOTAMINE MESYLATE                            |
| -1,148269545 | CEFAZOLIN SODIUM                                      |
| -1,173372314 | PERICIAZINE                                           |
| -1,182558574 | HEPTACHLOR                                            |
| -1,199155502 | METHYLBENZETHONIUM CHLORIDE                           |
| -1,20949101  | GITOXIGENIN                                           |
| -1,26797347  | BAEOMYCESIC ACID                                      |
| -1,268936133 | PHENELZINE SULFATE                                    |
| -1,285303482 | HIERACIN                                              |

|              |                                 |
|--------------|---------------------------------|
| -1,293416593 | DIETHYLCARBAMAZINE CITRATE      |
| -1,302833316 | MUNDULONE                       |
| -1,307838113 | PARACHLOROPHENOL                |
| -1,310031689 | SODIUM THIOGLYCOLATE            |
| -1,313973167 | MECLIZINE HYDROCHLORIDE         |
| -1,34447973  | METHENAMINE                     |
| -1,350577508 | NICOTINE DITARTRATE             |
| -1,354632316 | CLINDAMYCIN HYDROCHLORIDE       |
| -1,359825488 | METHICILLIN SODIUM              |
| -1,360271467 | NEOSTIGMINE BROMIDE             |
| -1,37945454  | DACTINOMYCIN                    |
| -1,388161963 | DIGOXIN                         |
| -1,393460673 | D-PHENYLALANINE                 |
| -1,445561865 | PHENINDIONE                     |
| -1,514244396 | GAMBOGIC ACID                   |
| -1,568112287 | PENICILLIN G POTASSIUM          |
| -1,577161779 | BENZALKONIUM CHLORIDE           |
| -1,596546472 | PENICILLAMINE                   |
| -1,680021647 | PENICILLIN V POTASSIUM          |
| -1,846394091 | GLYBURIDE                       |
| -1,864951683 | PODOFILOX                       |
| -1,947457537 | MECLOFENAMATE SODIUM            |
| -2,091083381 | PHENIRAMINE MALEATE             |
| -2,214330239 | PHENACEMIDE                     |
| -2,405699139 | PARGYLINE HYDROCHLORIDE         |
| -2,491230136 | 5alpha-CHOLESTAN-3beta-OL-6-ONE |



| Supplementary Table 2. List of first 18 hits confirmed by counterscreening and by qPCR on luciferase mRNA levels (Fig..xxxx) |                         |                                                                    |                    |            |                                                              |
|------------------------------------------------------------------------------------------------------------------------------|-------------------------|--------------------------------------------------------------------|--------------------|------------|--------------------------------------------------------------|
| Z score                                                                                                                      | MOLENAME                | cas#                                                               | Formula            | MolWt      | Bioactivity                                                  |
| 11,55294                                                                                                                     | AUROTHIOGLUCOSE         | 12192-57-3                                                         | C6H11AuO5S         | 392,18257  | antirheumatic                                                |
| 8,3054107                                                                                                                    | COLISTIMETHATE SODIUM   | 8068-28-8, 21362-08-3 [replaced]                                   | C57H103N16Na5O28S5 | 1735,81586 | antibacterial                                                |
| 9,0488367                                                                                                                    | DEXAMETHASONE           | 50-02-2                                                            | C22H29FO5          | 392,47183  | glucocorticoid                                               |
| 9,5774494                                                                                                                    | COLCHICINE              | 64-86-8                                                            | C22H25NO6          | 399,44765  | antimitotic, antigout agent                                  |
| 13,401401                                                                                                                    | CHLOROQUINE DIPHOSPHATE | 54-05-7                                                            | C18H32ClN3O8P2     | 515,87164  | antimalarial, antiamebic, antirheumatic, intercalating agent |
| 7,6245709                                                                                                                    | CORTISONE ACETATE       | 50-04-4, 53-06-5 [cortisone]                                       | C23H30O6           | 402,49195  | glucocorticoid                                               |
| 9,4577015                                                                                                                    | FLUMETHAZONE PIVALATE   | 2002-29-1, 2135-17-3 [flumethasone]                                | C27H36F2O6         | 494,58117  | glucocorticoid, antiinflammatory                             |
| 9,5337825                                                                                                                    | ESTRADIOL VALERATE      | 979-32-8                                                           | C23H32O3           | 356,50969  | estrogen                                                     |
| 12,458741                                                                                                                    | ESTRIOL                 | 50-27-1, 514-68-1 [as, succinate]                                  | C18H24O3           | 288,39018  | estrogen                                                     |
| 7,7844529                                                                                                                    | ERGONOVINE MALEATE      | 129-51-1, 60-79-7 [ergonovine]                                     | C23H27N3O6         | 441,48814  | oxytotic, 5HT antagonist                                     |
| 8,9847892                                                                                                                    | NITROFURANTOIN          | 67-20-9, 54-87-5 [nitrofurantoin sodium], 17140-81-7 [monohydrate] | C8H6N4O5           | 238,16082  | antibacterial                                                |
| 14,659134                                                                                                                    | MEGESTROL ACETATE       | 595-33-5, 3562-63-8 [megestrol]                                    | C24H32O4           | 384,52024  | progestogen, antineoplastic                                  |
| 7,1601434                                                                                                                    | MELPHALAN               | 148-82-3                                                           | C13H18Cl2N2O2      | 305,20661  | antineoplastic, alkylating agent                             |
| 7,0808647                                                                                                                    | METRONIDAZOLE           | 443-48-1, 69198-10-3 [metronidazole hydrochloride]                 | C6H9N3O3           | 171,15693  | antiprotozoal                                                |
| 8,3633183                                                                                                                    | THIMEROSAL              | 54-64-8                                                            | C9H9HgNaO2S        | 404,81468  | antiinfective, preservative                                  |
| 11,658503                                                                                                                    | DOXORUBICIN             | 23214-92-8                                                         | C27H29NO11         | 543,53228  | antineoplastic                                               |
| 21,999416                                                                                                                    | DERRUBONE               | 22044-58-2                                                         | C21H18O6           | 366,37401  | HSP90 inhibitor                                              |
| 14,847208                                                                                                                    | CYPROTERONE ACETATE     | 427-51-0                                                           | C24H29ClO4         | 416,94933  | antiandrogen                                                 |
